# Supplementary material for: Evidence for the contribution of degenerate hydrogen atom transport to the persistence of sulfanyl radicals anchored to nanostructured hybrid materials
Source: Royal Society of Chemistry journal article supplement (doi:10.1039/c7nj00891k), 2017-01-01

# Evidence for the Contribution of Degenerate Hydrogen Atom Transport to the Persistence of Sulfanyl radicals Anchored to Nanostructured Hybrid Materials

François Vibert,<sup>a</sup> Emily Bloch,<sup>b</sup> Michèle P. Bertrand,<sup>a</sup> Séverine Queyroy,<sup>\*a</sup> Stéphane  
Gastaldi,<sup>\*a</sup> Eric Besson<sup>\*a</sup>

<sup>a</sup> Aix Marseille Univ, CNRS, ICR, Marseille, France.

<sup>b</sup> Aix Marseille Univ, CNRS, MADIREL, Marseille, France.

E-mail : [stephane.gastaldi@univ-amu.fr](mailto:stephane.gastaldi@univ-amu.fr), [eric.besson@univ-amu.fr](mailto:eric.besson@univ-amu.fr)

## Electronic supplementary information

### Table of contents:

|                                                                                                                                    |     |
|------------------------------------------------------------------------------------------------------------------------------------|-----|
| EPR spectra and their decay curves                                                                                                 | S2  |
| Under photochemical conditions                                                                                                     | S2  |
| Under thermal conditions                                                                                                           | S3  |
| Simulations                                                                                                                        | S4  |
| NMR spectra for organic compounds <b>8, 7, 6, 5, 4, 3, 1</b>                                                                       | S11 |
| Small Angle X-Ray Scattering (SAXS) for <b>SBA<sub>27-1</sub>, SBA<sub>47-1</sub>, SBA<sub>190-1</sub></b>                         | S27 |
| Nitrogen adsorption/desorption analysis for <b>SBA<sub>27-1</sub>, SBA<sub>47-1</sub>, SBA<sub>190-1</sub></b>                     | S27 |
| <sup>13</sup> C and <sup>29</sup> Si CP-MAS solid state NMR for <b>SBA<sub>27-1</sub>, SBA<sub>47-1</sub>, SBA<sub>190-1</sub></b> | S30 |
| ATG for <b>SBA<sub>27-1</sub>, SBA<sub>47-1</sub>, SBA<sub>190-1</sub></b>                                                         | S31 |
| TEM for <b>SBA<sub>27-1</sub>, SBA<sub>47-1</sub></b>                                                                              | S32 |

# EPR spectra and their decay curves

Under photochemical irradiation at 293 K:

**SBA<sub>27</sub>-1:**

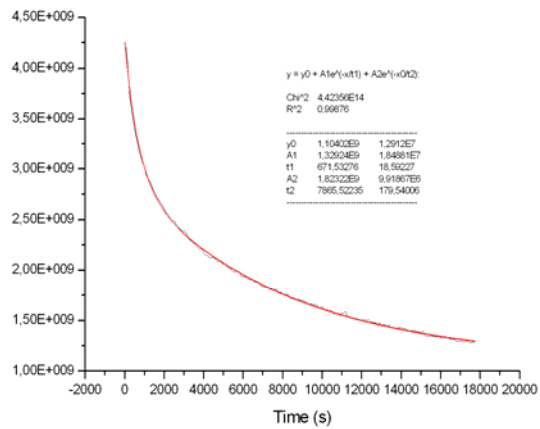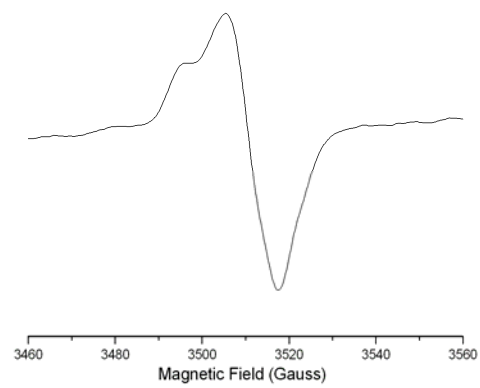

**SBA<sub>47</sub>-1:**

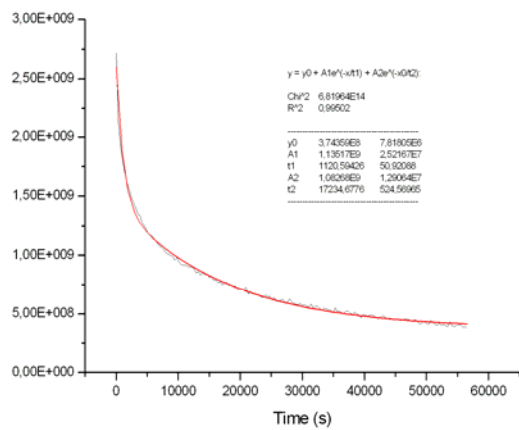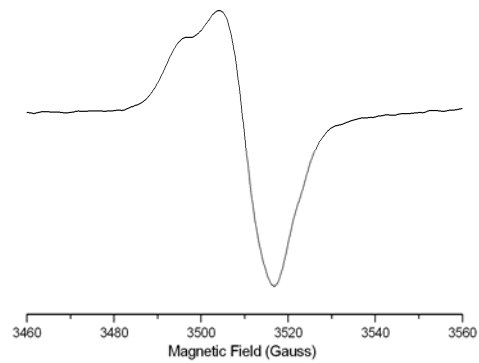

**SBA<sub>190</sub>-1:**

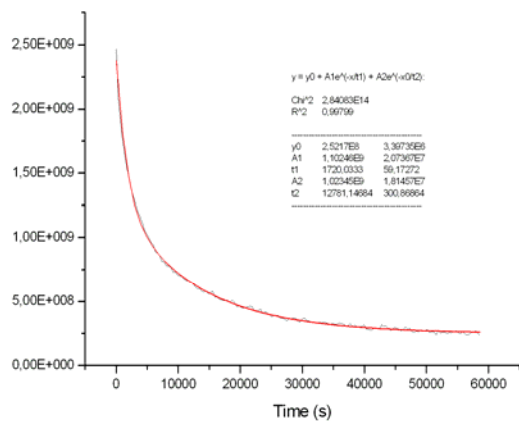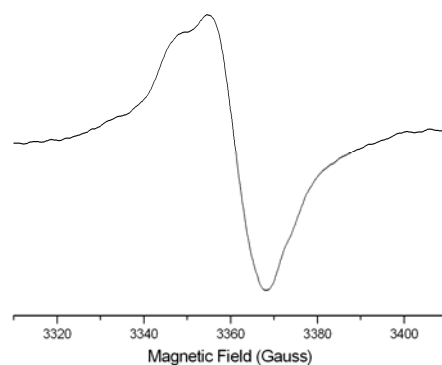

**Under thermal conditions at 473 K:**

**SBA<sub>27</sub>-1:**

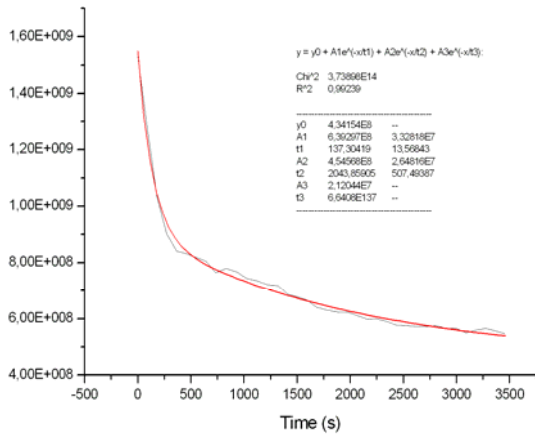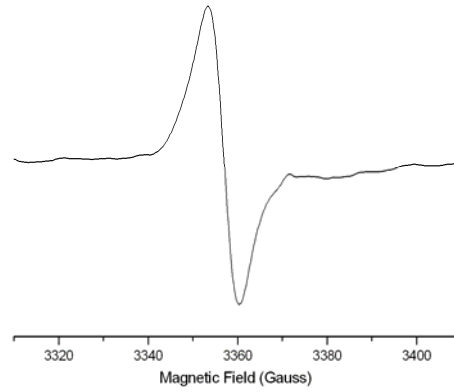

**SBA<sub>47</sub>-1:**

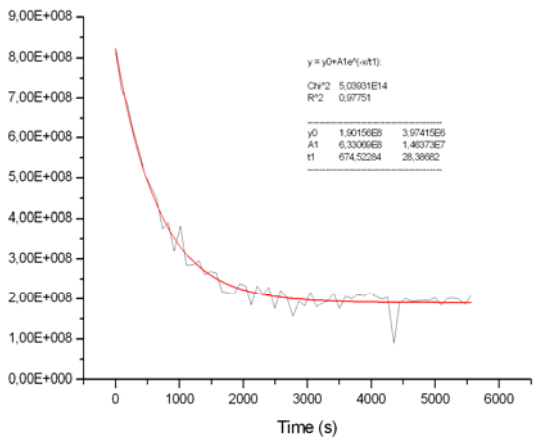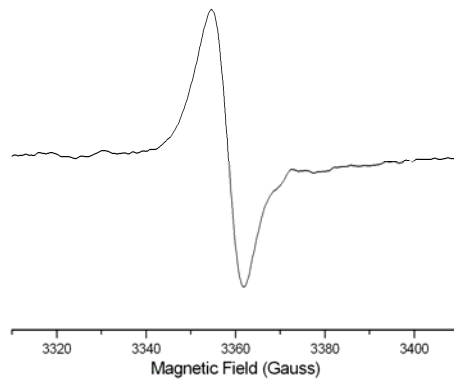

**SBA<sub>47</sub>-1\*:**

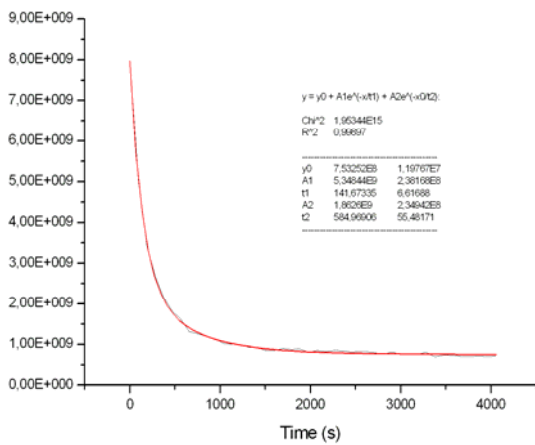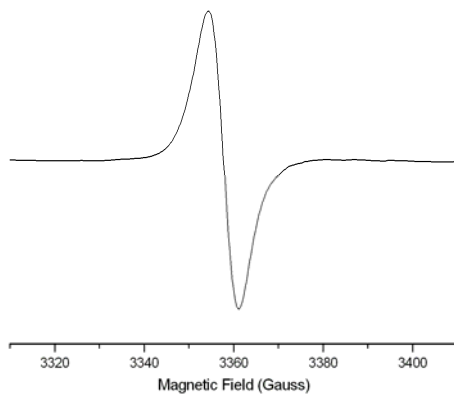

## Simulations

All simulations have been performed using gaussian 09.

The scan over the dihedral angle have been performed using the following command:

```
#opt=(ts,noeigen,modredundant) b3lyp/6-311+g(d,p)
```

```
D 18 21 42 39 S 24 15.0
```

This, in principle, ensures that the 24 stationary points found during the scan are transition states. We have checked that the transition states found really correspond to the hydrogen atom transfer (frequency is then approximately  $i1250\text{ cm}^{-1}$ ).

In practice, it happens that some of these stationary points have a second very low imaginary frequency. The geometry has properly converged to the correct transition state, but numerical inaccuracies in the Hessian are probably the source of this second nearly zero imaginary frequency.<sup>1</sup> Unfortunately, we were unable to remove this second imaginary frequency neither by using smaller optimization step, tighter energy gradient threshold, tighter scf orbital gradient threshold, tighter electron integral accuracy and tighter grid accuracy, nor by trying to deform the geometry in the direction of the strongest vector corresponding to this second imaginary frequency.

Tunneling effects on reaction coordinate motion can be evaluated by the means of the Wigner's multiplicative transmission coefficient  $\chi(T)$ ,<sup>2</sup> so that:  $k^{\text{TST}/T}(T) = \chi(T) \times k^{\text{TST}}(T)$ , where  $k^{\text{TST}}(T)$  is the reaction rate in the transition state theory and  $k^{\text{TST}/T}(T)$  is the reaction rate taking into account tunneling effects. In this relatively simple treatment, the imaginary frequency ( $\nu$ ) is used to compute the correction  $\chi(T)=1-1/24*(h\text{ Im}(\nu)/k/T)^2$ .

In our case, where  $\nu=1250\text{ cm}^{-1}$ , the transmission coefficient is 2.5 at 300K. This means that the degenerate hydrogen atom transfer is more than two times faster than classical thermodynamics would have predicted.

We can also use the Skodje-Truhlar<sup>3</sup> definition of the multiplicative transmission coefficient. In that case  $\chi(T)=\pi\beta/\alpha/\sin(\pi\beta/\alpha)+\beta\exp((\beta-\alpha)\Delta H)/(\beta-\alpha)\approx 7$ , which would imply even faster kinetics.

Six of these transition states structures have been used as starting points for IRC scans (30 steps of 0.1 Bohr in each direction) in order to evaluate the energy barrier for HAT.

The end points of the IRC scans were fully optimized at the same level of theory b3lyp/6-311+g(d,p) leading to two minima per TS.

The energies of the stationary points of these IRC are given in the table below and the geometry of the starting transition states is given further below.

|                               | Transition State            |                             | Minimum 1                               |                                         | Minimum 2                               |                                         |
|-------------------------------|-----------------------------|-----------------------------|-----------------------------------------|-----------------------------------------|-----------------------------------------|-----------------------------------------|
|                               | H (u.a.)                    | G (u.a.)                    | H (u.a.)<br>$\Delta H(\text{kcal/mol})$ | G (u.a.)<br>$\Delta G(\text{kcal/mol})$ | H (u.a.)<br>$\Delta H(\text{kcal/mol})$ | G (u.a.)<br>$\Delta G(\text{kcal/mol})$ |
| d=7.7 Å<br>$\varphi=3^\circ$  | -1646.448454<br><i>2ImF</i> | -1646.531224<br><i>2ImF</i> | -1646.455552<br>4.5                     | -1646.544456<br>8.3                     | -1646.455494<br>4.4                     | -1646.545594<br>9.0                     |
| d=7.4 Å<br>$\varphi=18^\circ$ | -1646.447911                | -1646.533973                | -1646.455494<br>4.8                     | -1646.545591<br>7.3                     | -1646.455526<br>4.8                     | -1646.544790<br>6.8                     |

<sup>1</sup> M. Malagoli and J. Baker, "The effect of grid quality and weight derivatives in density functional calculations of harmonic vibrational frequencies" *J Chem Phys*, 2003, **119**,12763-12768.

<sup>2</sup> E. Wigner, *Z. Phys. Chem. B*, 1932, **19**, 203-216.

<sup>3</sup> R. T. Skodje and D. G. Truhlar, *J. Phys. Chem.*, 1981, **85**, 624-628

|                     |                             |                             |                     |                     |                     |                     |
|---------------------|-----------------------------|-----------------------------|---------------------|---------------------|---------------------|---------------------|
| d=14.9 Å<br>φ=67°   | -1646.448508                | -1646.535082                | -1646.455880<br>4.6 | -1646.546347<br>7.0 | -1646.455552<br>4.4 | -1646.544480<br>5.9 |
| d=12.9 Å<br>φ=-72°  | -1646.449555<br><i>2ImF</i> | -1646.531996<br><i>2ImF</i> | -1646.455551<br>3.8 | -1646.544469<br>7.8 | -1646.455881<br>4.0 | -1646.546389<br>9.0 |
| d=19.4 Å<br>φ=168   | -1646.448114                | -1646.534022                | -1646.455103<br>4.4 | -1646.545805<br>7.4 | -1646.454710<br>4.1 | -1646.546225<br>7.7 |
| d=19.4 Å<br>φ=-177° | -1646.447940                | -1646.535601                | -1646.455528<br>4.8 | -1646.544794<br>5.8 | -1646.455892<br>5.0 | -1646.545783<br>6.4 |

**First TS structure, with  $d=7.7 \text{ \AA}$  and  $\phi=3^\circ$ :**

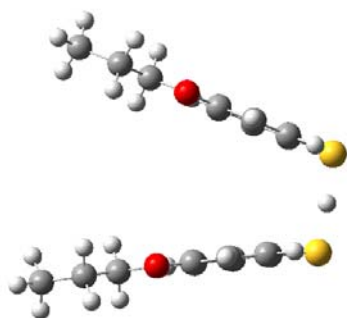

**Coordinates ( $\text{\AA}$ ):** C,-4.803557, 3.961377,-0.643768\H,-5.732684,4.230412,-0.136424\  
H,-5.019976,3.112824,-1.300252\H,-4.51638,4.807053,-1.276088\  
C,-.708767,3.622219,0.371789\H,-4.026047,2.790827,1.008613\  
H,-3.528047,4.475421,1.032552\C,-2.400062,3.245662,-0.303939\  
H,-2.029585,4.073185,-0.921681\H,-2.533431,2.368288,-0.94925\  
C,-0.183464,2.588405,0.374705\C,0.691268,2.328415,1.44297\  
C,0.278058,2.473383,-0.943506\C,1.999747,1.961752,1.19693\  
H,0.31564,2.427927,2.454272\C,1.596002,2.098644,-1.17989\  
H,-0.375228,2.671604,-1.782364\C,2.483395,1.836048,-0.123325\  
H,2.674412,1.773927,2.023315\H,1.953678,2.00865,-2.198408\  
S,4.164285,1.434013,-0.444652\C,-5.078864,-3.726869,-0.677102\  
H,-5.214074,-2.961788,-1.447967\H,-6.044923,-3.877898,-0.190268\  
H,-4.812835,-4.662158,-1.17898\C,-4.014723,-3.315391,0.344202\  
H,-3.914548,-4.083609,1.116919\H,-4.312735,-2.393203,0.852364\  
C,-2.65912,-3.098254,-0.302109\H,-2.705203,-2.300833,-1.054308\  
H,-2.309319,-4.014712,-0.795608\C,-0.432554,-2.504157,0.412835\  
C,0.409789,-2.182974,1.490345\C,0.095924,-2.576338,-0.883179\  
C,1.75284,-1.94366,1.275569\H,-0.01803,-2.135705,2.484529\  
C,1.448482,-2.327666,-1.088862\H,-0.53207,-2.823379,-1.728459\  
C,2.304911,-2.009818,-0.0219\H,2.401513,-1.709905,2.11096\  
H,1.857866,-2.383248,-2.090223\H,4.026178,-1.780642,-0.295122\  
H,4.103064,-0.167717,-0.239992\O,-1.732615,-2.730045,0.728508\  
O,-1.445328,2.946975,0.72056

**Freq ( $\text{cm}^{-1}$ ):** i1256.2582, i12.3997, 6.7787, 17.9288, 25.4849, 33.2133, 38.0628, 56.4345, 78.8237, 83.0765, 91.5270, 92.7999, 110.8642, 133.1393, 154.0233, 167.7945, 231.4581, 234.4092, 237.5597, 239.3183, 255.6268, 273.8458, 277.1786, 318.4449, 330.1760, 331.9349, 334.2666, 414.8387, 416.6571, 440.7858, 445.6612, 460.7407, 505.2200, 506.1780, 517.8438, 518.0716, 641.6260, 642.2355, 684.2987, 684.5099, 706.9945, 709.5496, 772.0010, 772.4099, 812.6132, 815.9254, 837.2028, 837.7796, 840.9994, 842.5863, 910.8416, 911.6343, 916.3724, 916.7810, 954.9221, 955.4714, 979.0589, 982.1831, 1019.8061, 1020.3802, 1030.7959, 1031.7145, 1041.0126, 1053.5935, 1054.5402, 1098.3946, 1105.9478, 1128.2013, 1129.9054, 1144.4884, 1145.1260, 1181.5172, 1181.7713, 1191.1429, 1196.3441, 1270.3795, 1270.9571, 1271.3678, 1278.5612, 1309.2585, 1311.6769, 1323.9302, 1324.9425, 1325.4765, 1325.9835, 1339.6876, 1339.9811, 1417.0974, 1417.9624, 1426.3838, 1426.8777, 1440.6200, 1441.8594, 1494.4547, 1495.5803, 1501.8994, 1502.6772, 1504.1501, 1504.7751, 1509.5882, 1510.2564, 1523.3163, 1524.0021, 1576.9448, 1577.6716, 1617.3521, 1622.7002, 2994.0483, 2994.5217, 3023.4274, 3023.6681, 3031.4189, 3031.8841, 3036.9719, 3037.2982, 3065.5090, 3065.8798, 3089.5638, 3090.0794, 3096.3860, 3096.6815, 3183.4634, 3183.9431, 3187.5744, 3188.1386, 3198.3380, 3198.9748, 3206.9516, 3209.4802

**Second TS structure, with  $d=7.4 \text{ \AA}$  and  $\phi=18^\circ$ :**

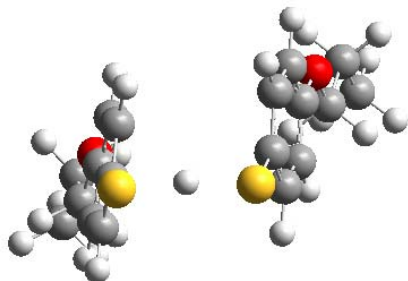

**Coordinates ( $\text{\AA}$ ):** C,-4.572834,3.931013,-0.428857\H,-5.3943,4.41619,0.102957\  
H,-4.913486,2.933339,-0.722721\H,-4.388031,4.503194,-1.343135\  
C,-3.321802,3.860398,0.451725\H,-3.536543,3.309042,1.372166\  
H,-3.011527,4.866354,0.750056\C,-2.162002,3.184606,-0.261695\  
H,-1.89537,3.731765,-1.174477\H,-2.423405,2.156213,-0.540482\  
C,0.130158,2.624007,0.221222\C,1.180519,2.663515,1.15376\  
C,0.343493,2.050744,-1.039837\C,2.415468,2.135601,0.831869\  
H,0.996918,3.117387,2.120309\C,1.591352,1.524438,-1.354172\  
H,0.996918,3.117387,2.120309\C,1.591352,1.524438,-1.354172

H,-0.448383,2.012187,-1.775467\C,2.649956,1.550931,-0.431818\  
H,3.225186,2.172619,1.550608\H,1.757002,1.082705,-2.329183\  
S,4.236627,0.924964,-0.858294\C,-5.301032,-  
3.473296,-0.768738\H,-5.252374,-3.050027,-1.776777\H,-6.329304,-3.3670  
93,-0.416019\H,-5.087852,-4.543748,-0.846137\C,-4.325274,-2.774252,0.1  
82393\H,-4.409255,-3.195861,1.188566\H,-4.571446,-1.711053,0.263743\C,  
-2.883764,-2.907102,-0.281842\H,-2.752926,-2.461089,-1.275833\H,-2.589  
908,-3.962526,-0.338263\C,-0.704295,-2.222596,0.484287\C,0.04317,-1.57  
618,1.482723\C,-0.045759,-2.810749,-0.604091\C,1.420777,-1.524008,1.39  
6732\H,-0.484146,-1.131765,2.318192\C,1.340334,-2.740707,-0.687522\H,-  
0.598367,-3.316264,-1.384367\C,2.102838,-2.10358,0.305646\H,1.992875,-  
1.036597,2.176307\H,1.850179,-3.188366,-1.531977\S,3.857721,-2.091993,  
0.206607\H,4.085128,-0.554296,-0.22847\O,-2.050035,-2.227379,0.663554\  
O,-1.042222,3.169061,0.63103

**Frequencies (cm<sup>-1</sup>):** i1250.503500,4.760800,10.941900,20.974300,32.502400,37.743200,40.371100,57.599300,82.150900,85.864600,  
91.550100,92.582500,112.163600,133.675900,154.463900,167.311700,232.146300,236.650000,240.168600,240.453600,263.578700,273.9  
05000,278.468100,320.635700,331.961300,332.249800,336.746900,414.612600,418.567000,438.416900,445.743400,452.212800,505.1868  
00,505.943600,517.809200,521.391800,641.665100,642.062900,684.499500,684.763300,710.136000,718.114700,771.901900,773.096500,  
812.453700,814.905200,837.344100,837.708100,841.319000,842.929300,911.237700,911.559100,916.386900,916.788800,954.876700,957  
.781500,981.064500,982.833400,1020.079700,1020.409800,1029.087400,1030.622100,1031.319700,1053.584700,1054.553500,1097.7453  
00,1106.661500,1128.863400,1130.045400,1144.927900,1145.406700,1181.487100,1181.867600,1191.940700,1196.805500,1270.413400,  
1271.430100,1271.860500,1278.847400,1309.469400,1311.419700,1324.467300,1325.703900,1325.888300,1326.468400,1339.197000,134  
0.888300,1416.643800,1417.221700,1425.849800,1427.737900,1441.139700,1441.796000,1494.626700,1495.667300,1502.150800,1502.7  
00500,1504.411200,1504.729300,1509.519100,1510.349900,1522.917900,1523.821700,1577.218400,1577.421600,1617.324300,1622.1179  
00,2994.164000,2995.025400,3023.897400,3023.985500,3031.811500,3032.592700,3036.655400,3037.871900,3065.905500,3066.412700,  
3090.129000,3090.545100,3096.783500,3097.118300,3182.470800,3185.553200,3187.509100,3188.033500,3197.517000,3200.698100,320  
6.923300,3208.483100

**Third TS structure, with d=14.9 Å and φ=67°:**

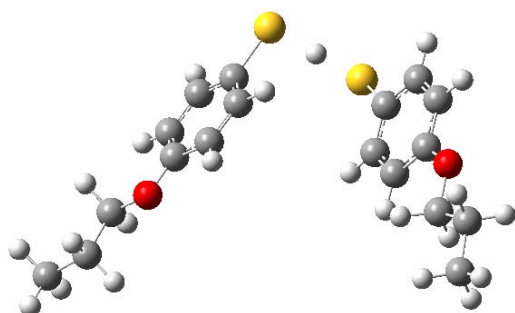

**Coordinates (Å):** C,-6.7069145046,4.1875472403,-0.3886186848\H,-7.664101  
0034,4.5658447481,-0.7543243912\H,-5.9170853179,4.6652235209,-0.976453  
214\H,-6.5965657869,4.5172811661,0.6490230703\C,-6.646839832,2.6615450  
021,-0.5022997836\H,-6.7824633155,2.353251599,-1.5433613673\H,-7.45993  
92616,2.2064313673,0.0712913802\C,-5.3249634189,2.1045238158,0.0012403  
562\H,-5.1711000283,2.3618562518,1.0566179593\H,-4.4863093578,2.510571  
1729,-0.5779171845\C,-4.2874806907,-0.0595082124,0.2228788433\C,-4.408  
6734939,-1.4468732837,0.0365808063\C,-3.104638245,0.4674072457,0.75958  
43602\C,-3.3671760363,-2.2879534195,0.3773150313\H,-5.3316150746,-1.83  
40456964,-0.3780975666\C,-2.0627602427,-0.3887054206,1.0996530486\H,-2  
.9894510261,1.5312550379,0.9169005295\C,-2.1675479166,-1.7769256507,0.  
9158772122\H,-3.4639691751,-3.3569467074,0.2321603158\H,-1.1498094862,  
0.0179691339,1.517648501\S,-0.8585700182,-2.8538409118,1.3858654378\C,  
8.0321698761,2.6285304122,1.0263929855\H,8.6832911914,1.9988283976,0.4  
123834161\H,8.0055999047,2.1996162035,2.0327970051\H,8.4997907431,3.61  
28855001,1.0998235672\C,6.627602508,2.7377922823,0.4259293941\H,6.6748  
377628,3.1888143353,-0.5698990799\H,6.0024246548,3.3922687316,1.040904  
7842\C,5.9502728672,1.3813345637,0.3141861375\H,5.8505984724,0.9139115  
582,1.3016165686\H,6.5322447607,0.7086740404,-0.3279485934\C,3.8397954  
467,0.5133090405,-0.4590058611\C,2.583428913,0.7987318182,-1.019782736  
3\C,4.1772899143,-0.8122327726,-0.1536693267\C,1.6847615707,-0.2207539  
76,-1.2690626429\H,2.3442240961,1.8293101922,-1.2534894704\C,3.2642461  
87,-1.8300377966,-0.406614907\H,5.1384831758,-1.0580299437,0.276700584  
5\C,2.0045448373,-1.5609030931,-0.9649737878\H,0.7195009411,0.00194323  
39,-1.7073507193\H,3.5249165618,-2.8544007651,-0.1697300985\S,0.879497  
5658,-2.865954264,-1.3178682167\H,0.0022526664,-2.8336839019,0.0303110  
47\O,4.6505453414,1.5812340848,-0.2542785173\O,-5.3630907264,0.6801611  
193,-0.1443561927

**Frequencies (cm<sup>-1</sup>):** i1234.1619, 4.2759, 15.7419, 18.3362, 28.2501, 30.9972, 43.6104, 50.9919, 80.2350, 83.2829, 92.9530, 94.1515, 113.5958, 127.5817, 155.1982, 161.4877, 235.5275, 236.5540, 240.4074, 242.0287, 266.5673, 272.4292, 290.6653, 315.2224, 332.6294, 333.6593, 339.2265, 417.1788, 418.0346, 444.6214, 446.4286, 505.1026, 505.4330, 516.1050, 516.7148, 642.0738, 642.1963, 683.5086, 684.3975, 697.8655, 703.9361, 750.3458, 766.1916, 772.8592, 773.9714, 813.1615, 815.1218, 837.6814, 838.0168, 844.3833, 846.1677, 911.6117, 913.4342, 917.0974, 917.3806, 955.0954, 955.9536, 978.9142, 981.4350, 1020.3383, 1020.4998, 1030.3285, 1031.3964, 1053.3501, 1054.4212, 1098.7709, 1107.0157, 1128.8756, 1129.1114, 1144.9235, 1145.2673, 1181.4625, 1182.1258, 1192.5628, 1196.6398, 1272.2248, 1272.3729, 1273.5835, 1278.2019, 1310.5444, 1311.3275, 1324.9790, 1325.9633, 1326.2595, 1327.4674, 1339.8540, 1340.8119, 1417.9950, 1418.2614, 1426.7279, 1427.0993, 1441.1987, 1441.5003, 1494.9925, 1495.5504, 1502.9553, 1503.1733, 1504.4781, 1505.1219, 1509.9075, 1510.5208, 1523.0984, 1524.1044, 1577.8371, 1578.4196, 1617.8701, 1622.7878, 2995.6131, 2995.9910, 3024.0400, 3024.1720, 3033.2313, 3033.8275, 3036.9905, 3037.7618, 3066.4463, 3066.7178, 3090.5311, 3090.7971, 3096.5725, 3096.8585, 3182.2874, 3184.1441, 3186.8203, 3187.7494, 3197.4149, 3199.0446, 3207.8160, 3210.1206

**Fourth TS structure, with d=12.9 Å and φ=-72°:**

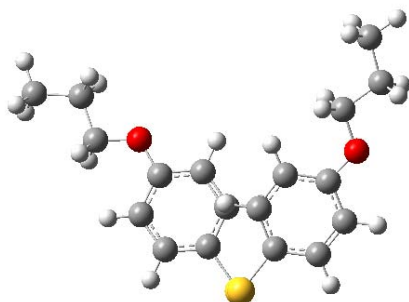

**Coordinates (Å):** C,-7.13024,-3.26009,-0.973961\H,-7.464065,-4.299621,-0.942265\  
H,-7.078437,-2.962114,-2.025575\H,-7.90127,-2.651169,-0.492115\  
C,-5.774895,-3.103665,-0.278188\H,-5.025463,-3.737811,-0.761549\  
H,-5.843594,-3.432033,0.763341\C,-5.284687,-1.664976,-0.303562\  
H,-5.994464,-1.003459,0.20836\H,-5.168724,-1.311199,-1.335846\  
C,-3.370388,-0.432311,0.485808\C,-2.14284,-0.474106,1.167743\  
C,-3.844538,0.788269,-0.014207\C,-1.406907,0.681531,1.346966\  
H,-1.79637,-1.426591,1.550621\C,-3.094141,1.94461,0.168827\  
H,-4.786751,0.846463,-0.541913\C,-1.866096,1.919206,0.848847\  
H,-0.464337,0.64705,1.879353\H,-3.459836,2.887683,-0.218779\  
S,-0.953925,3.398889,1.118233\C,5.59962,-4.693341,0.20593\  
H,4.670314,-5.133491,0.58037\H,6.429155,-5.24921,0.648529\  
H,5.633652,-4.855258,-0.875776\C,5.696156,-3.205,0.553825\  
H,6.641697,-2.791471,0.190193\H,5.687121,-3.067898,1.639361\  
C,4.552076,-2.405057,-0.047935\H,3.586087,-2.765783,0.326906\  
H,4.550629,-2.491765,-1.141581\C,3.835051,-0.105178,-0.099216\  
C,4.091315,1.216731,0.303276\C,2.711174,-0.384346,-0.888441\  
C,3.242794,2.237475,-0.078959\H,4.965991,1.410975,0.912341\  
C,1.861153,0.650511,-1.26379\H,2.492903,-1.392945,-1.212096\  
C,2.105172,1.976625,-0.871757\H,3.44597,3.255662,0.22948\  
H,0.991483,0.43555,-1.872683\H,1.045767,3.278864,-1.396762\  
H,0.056876,3.332827,-0.130193\O,4.728944,-1.033136,0.323859\  
O,-4.018531,-1.617986,0.364985

**Frequencies (cm<sup>-1</sup>):** i1234.701600,i14.208500,6.897900,23.787300,27.561700,30.926600,42.945900,52.789200,81.352900,83.494100, 93.150300,95.672800,111.704500,127.385200,153.881500,163.170800,233.018500,237.067800,240.374500,242.549000,267.250900,272.8 44700,289.858700,315.176100,331.364900,334.104400,340.896600,417.451800,418.522600,442.971400,446.519700,504.691400,505.2425 00,512.808700,518.162700,640.135500,642.178200,643.778100,684.424700,686.025300,711.441400,724.292900,772.473000,772.917600, 813.522000,813.817800,830.663400,836.386200,839.445900,844.595100,863.942500,911.456200,911.483100,916.755800,916.914200,956 .169200,957.212600,981.238900,984.143000,1020.215300,1021.296100,1030.827700,1031.910200,1053.550100,1054.821100,1098.74820 0,1107.245900,1128.942400,1129.905200,1145.075900,1145.591000,1181.506700,1181.802000,1191.005700,1196.316600,1271.412200,1 272.283700,1273.338000,1280.170400,1311.295900,1311.418400,1325.453300,1326.542500,1326.730000,1328.880300,1340.350900,1340 .920600,1416.448100,1417.261600,1427.351900,1427.684700,1440.406400,1441.274900,1495.427400,1495.560900,1501.978900,1502.66 2000,1504.652300,1505.223200,1510.102500,1510.846400,1522.901900,1524.512600,1577.544800,1579.874900,1618.142200,1623.07730 0,2994.799600,2995.297600,3024.000300,3024.288500,3032.563300,3033.248500,3037.026100,3038.411000,3066.246000,3066.730200,3 090.281000,3090.894700,3096.164300,3096.893700,3183.074100,3184.380200,3187.698500,3188.406200,3198.966100,3199.639800,3208 .293300,3209.637400

**Fifth TS structure, with d=19.4 Å and φ=168°:**



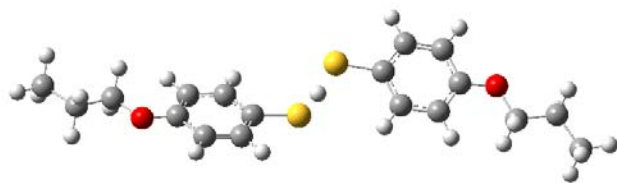

**Coordinates (Å):** C,-9.4530438448,1.6041065925,0.2301530286\H,-1  
 0.4866381148,1.5168385302,-0.1120695522\H,-9.0818688458,2.5833822855,-  
 0.0873220649\H,-9.4652099297,1.5904748882,1.324348551\C,-8.596045974,0  
 .4679085529,-0.3360072079\H,-8.6182700136,0.4855755615,-1.4298565681\H  
 ,-8.9997347456,-0.5009925874,-0.026804131\C,-7.1493453563,0.5598881317  
 ,0.1225853031\H,-7.0841418332,0.5105301109,1.2166853982\H,-6.695299820  
 3,1.5026634685,-0.2070549875\C,-5.1141572717,-0.6951221426,-0.18474095  
 85\C,-4.4974051276,-1.8092932141,-0.7775088967\C,-4.3581047902,0.16820  
 211,0.6202520694\C,-3.1530269897,-2.0524151313,-0.5712812264\H,-5.0976  
 3551,-2.4629030566,-1.3989670658\C,-3.0082895916,-0.091822735,0.830672  
 3008\H,-4.8096575214,1.0331499764,1.0868852798\C,-2.3774406315,-1.2005  
 048014,0.2428738998\H,-2.6787608355,-2.9070913494,-1.037958352\H,-2.42  
 94390656,0.5706794708,1.4628813944\S,-0.6793536386,-1.5524114904,0.535  
 6088153\C,9.7929388506,-0.5678668393,-0.1647418945\H,9.6592863858,-1.6  
 323694295,-0.3803275383\H,10.7073928502,-0.4631474385,0.4233643954\H,9  
 .9516122797,-0.051845985,-1.1166118194\C,8.5919089059,0.0070819874,0.5  
 923301306\H,8.7583139627,1.0644997139,0.8193219286\H,8.4667873237,-0.5  
 065724392,1.5503370069\C,7.3015310113,-0.1221441242,-0.2013389601\H,7.  
 0791209676,-1.1752434395,-0.4138143796\H,7.377407024,0.4130629777,-1.1  
 560450802\C,4.9803982373,0.4593346369,0.0876518967\C,4.0055482676,1.03  
 20864493,0.9221630139\C,4.608898441,-0.0447972122,-1.1657994391\C,2.68  
 95697226,1.1049750088,0.5083999732\H,4.3129643282,1.4169533613,1.88711  
 2761\C,3.2792978848,0.0231040377,-1.5681448472\H,5.3392759638,-0.49322  
 42535,-1.8253920117\C,2.2954746267,0.5996674209,-0.7490150461\H,1.9453  
 957698,1.5577862523,1.1522846108\H,2.9904067785,-0.3770713716,-2.53242  
 59321\S,0.6322519506,0.7179234025,-1.307405269\H,-0.0415998098,-0.2966  
 626514,-0.2482324428\O,6.2434424604,0.4423825832,0.5821666862\O,-6.435  
 7737317,-0.5424398186,-0.4497227723

**Frequencies (cm<sup>-1</sup>):** i1248.6170, 7.0612, 12.5980, 23.3334, 24.9767, 37.9051, 43.7570, 49.6705, 80.8454, 84.5586, 91.1043, 93.0630,  
 116.9358, 122.2685, 154.6986, 158.0814, 230.4495, 235.8525, 239.7155, 241.1984, 266.1890, 272.0537, 278.8548, 314.1041, 329.9592,  
 332.3384, 346.7832, 416.5665, 420.1053, 443.4989, 446.6703, 503.8962, 504.9412, 519.1510, 521.8429, 589.4875, 642.1571, 642.6422,  
 683.4827, 683.9565, 717.8594, 722.1172, 771.6906, 773.4682, 814.0353, 814.7101, 837.4197, 837.7244, 841.1643, 843.2273, 910.8308,  
 912.9817, 916.0717, 916.5658, 953.4479, 955.2194, 979.1151, 980.8018, 1020.2877, 1020.4813, 1030.3600, 1030.6896, 1051.1550,  
 1053.4746, 1054.3433, 1098.1582, 1107.4663, 1129.7342, 1131.0756, 1144.7648, 1145.1487, 1181.4820, 1182.3525, 1193.1989,  
 1197.0132, 1270.5749, 1272.8196, 1273.0657, 1278.2178, 1310.4908, 1313.3797, 1324.7054, 1325.2632, 1326.3299, 1328.0910,  
 1339.4492, 1340.6142, 1416.3660, 1416.5148, 1425.5419, 1427.7565, 1441.4930, 1442.0305, 1495.1206, 1495.1856, 1502.3223,  
 1503.0748, 1504.8399, 1505.0654, 1510.1881, 1510.5071, 1523.2135, 1523.7174, 1578.3028, 1578.5244, 1617.7840, 1623.5970,  
 2994.5853, 2995.5990, 3023.7751, 3023.9073, 3032.5172, 3033.4414, 3037.1914, 3037.4214, 3066.2130, 3066.6034, 3090.3894,  
 3090.8066, 3096.7890, 3096.8309, 3183.1875, 3184.5134, 3186.2261, 3187.1085, 3198.1402, 3199.4712, 3207.9015, 3208.5638

**Sixth TS structure, with d=19.4 Å and φ=-177°:**

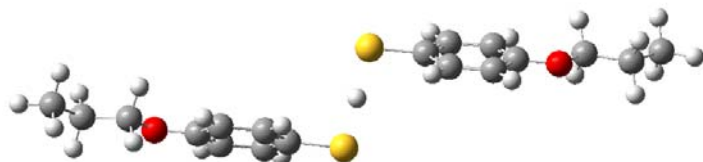

**Coordinates (Å):** C,-9.531825,1.388165,-0.279556\H,-10.51612,1.214941,-0.720296\  
 H,-9.175489,2.358459,-0.638709\H,-9.663876,1.461448,0.804303\  
 C,-8.56392,0.261493,-0.652479\H,-8.466204,0.1902,-1.739981\  
 H,-8.951257,-0.70129,-0.305506\C,-7.183192,0.474786,-0.053074\  
 H,-7.236929,0.513846,1.042037\H,-6.745028,1.415164,-0.409876\  
 C,-5.059149,-0.662858,-0.053219\C,-4.314438,-1.7653,-0.503747\  
 C,-4.446545,0.302015,0.758214\C,-2.983496,-1.8951,-0.156082\  
 H,-4.805515,-2.499454,-1.131087\C,-3.109899,0.15544,1.112561\  
 H,-4.998931,1.158797,1.119556\C,-2.350817,-0.937297,0.663536\  
 H,-2.409111,-2.740118,-0.515522\H,-2.641778,0.896964,1.748731\  
 S,-0.666431,-1.134718,1.129705\C,9.705807,-0.87644,-0.537121\  
 O,-0.2482324428

H,9.466877,-1.925348,-0.737628\H,10.676682,-0.849596,-0.037362\  
H,9.816421,-0.369305,-1.500519\C,8.63123,-0.211127,0.327752\  
H,8.90107,0.829066,0.533979\H,8.556853,-0.716781,1.295284\  
C,7.266262,-0.236631,-0.34089\H,6.944874,-1.268645,-0.52869\  
H,7.293245,0.29519,-1.300182\C,5.033174,0.513947,0.164853\  
C,4.187727,1.157564,1.084373\C,4.507517,0.03761,-1.04347\  
C,2.846874,1.326191,0.797879\H,4.61382,1.519762,2.012265\  
C,3.153757,0.201448,-1.316755\H,5.136786,-0.462876,-1.766709\  
C,2.298147,0.848249,-0.411144\H,2.202665,1.833518,1.505775\  
H,2.744744,-0.177598,-2.24541\S,0.600747,1.083221,-0.805296\  
H,-0.044949,0.09712,0.296678\O,6.333004,0.404399,0.5365\  
O,-6.354403,-0.622205,-0.454181

Frequencies(cm<sup>-1</sup>): i1250.7542, 2.0859, 9.3634, 20.7667, 23.0907, 37.2823, 43.7442, 47.9985, 81.1000, 81.6553, 91.1013, 93.2797, 115.8705, 121.2859, 154.3133, 158.1941, 226.7756, 230.3089, 233.0110, 239.9807, 268.0059, 272.3757, 277.5374, 314.2927, 331.3905, 332.4557, 354.0549, 416.8739, 420.4872, 443.6880, 446.4941, 504.5363, 505.0480, 518.8499, 523.6502, 565.2976, 642.3631, 642.6747, 683.8452, 684.2481, 717.6533, 721.6685, 772.7176, 773.0383, 814.5449, 814.7584, 837.7297, 837.8625, 841.4028, 843.0974, 910.8868, 911.9905, 916.1817, 916.4624, 954.3976, 954.9605, 979.7658, 980.6427, 1020.5114, 1020.7137, 1030.7259, 1031.0456, 1053.3500, 1053.6859, 1058.5568, 1098.4736, 1106.7893, 1130.3090, 1131.0487, 1144.9541, 1145.2518, 1181.5573, 1181.7373, 1193.9901, 1197.8613, 1270.6646, 1271.5936, 1273.5059, 1278.6898, 1310.8408, 1313.6304, 1325.3140, 1325.7274, 1326.6688, 1326.8561, 1339.9197, 1340.4735, 1416.0135, 1416.2408, 1427.1242, 1427.3434, 1441.8692, 1442.4700, 1495.3050, 1495.4411, 1501.3010, 1501.4344, 1505.2411, 1505.3080, 1510.4769, 1510.9168, 1523.8974, 1524.2380, 1578.9594, 1579.4049, 1618.1183, 1623.8413, 2994.7407, 2995.4898, 3023.4933, 3023.6877, 3032.6451, 3033.1242, 3037.1654, 3037.3509, 3066.0576, 3066.0786, 3090.2388, 3090.3026, 3096.2035, 3096.6235, 3183.2227, 3184.4750, 3186.4612, 3187.5293, 3198.1186, 3199.4056, 3209.2238, 3209.5531

Methyl 2-methyl-2-(sulfonsulfonoylamino)propanoate: <sup>1</sup>H NMR

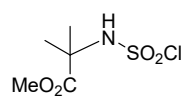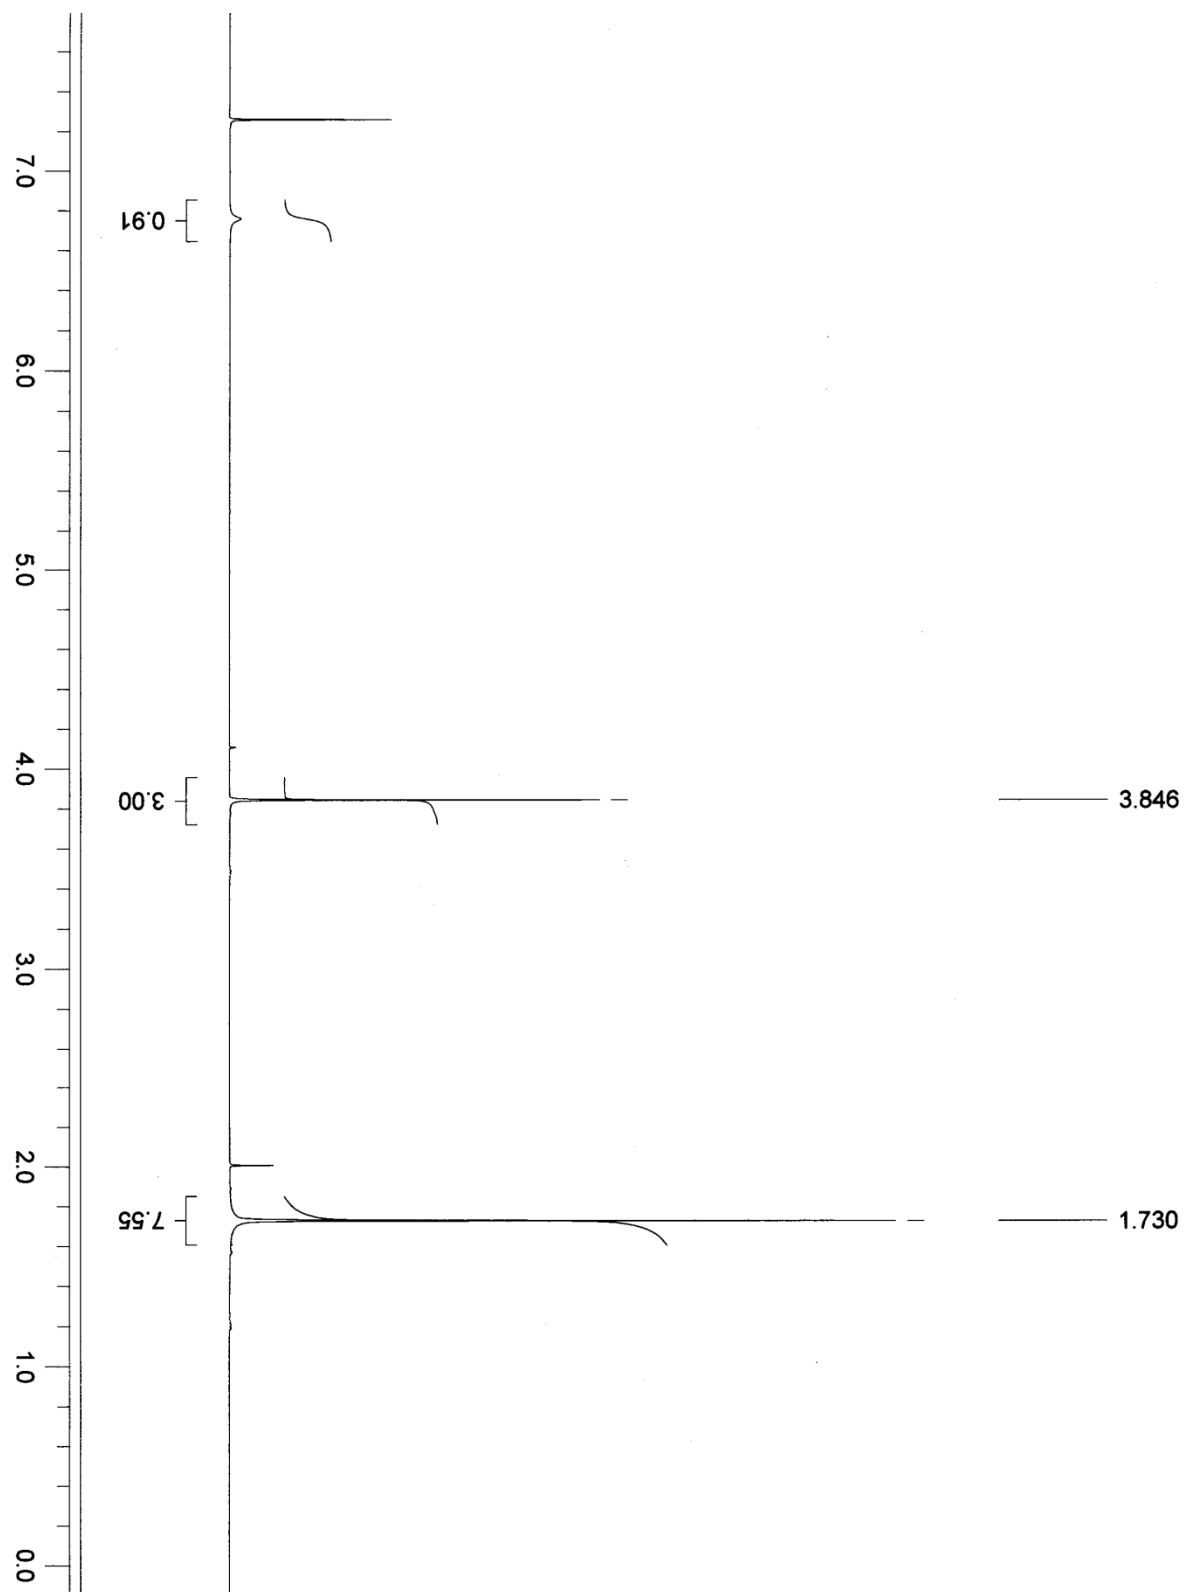

Methyl 2-methyl-2-(sulfonsulfonylamino)propanoate:  $^{13}\text{C}$  NMR (APT)

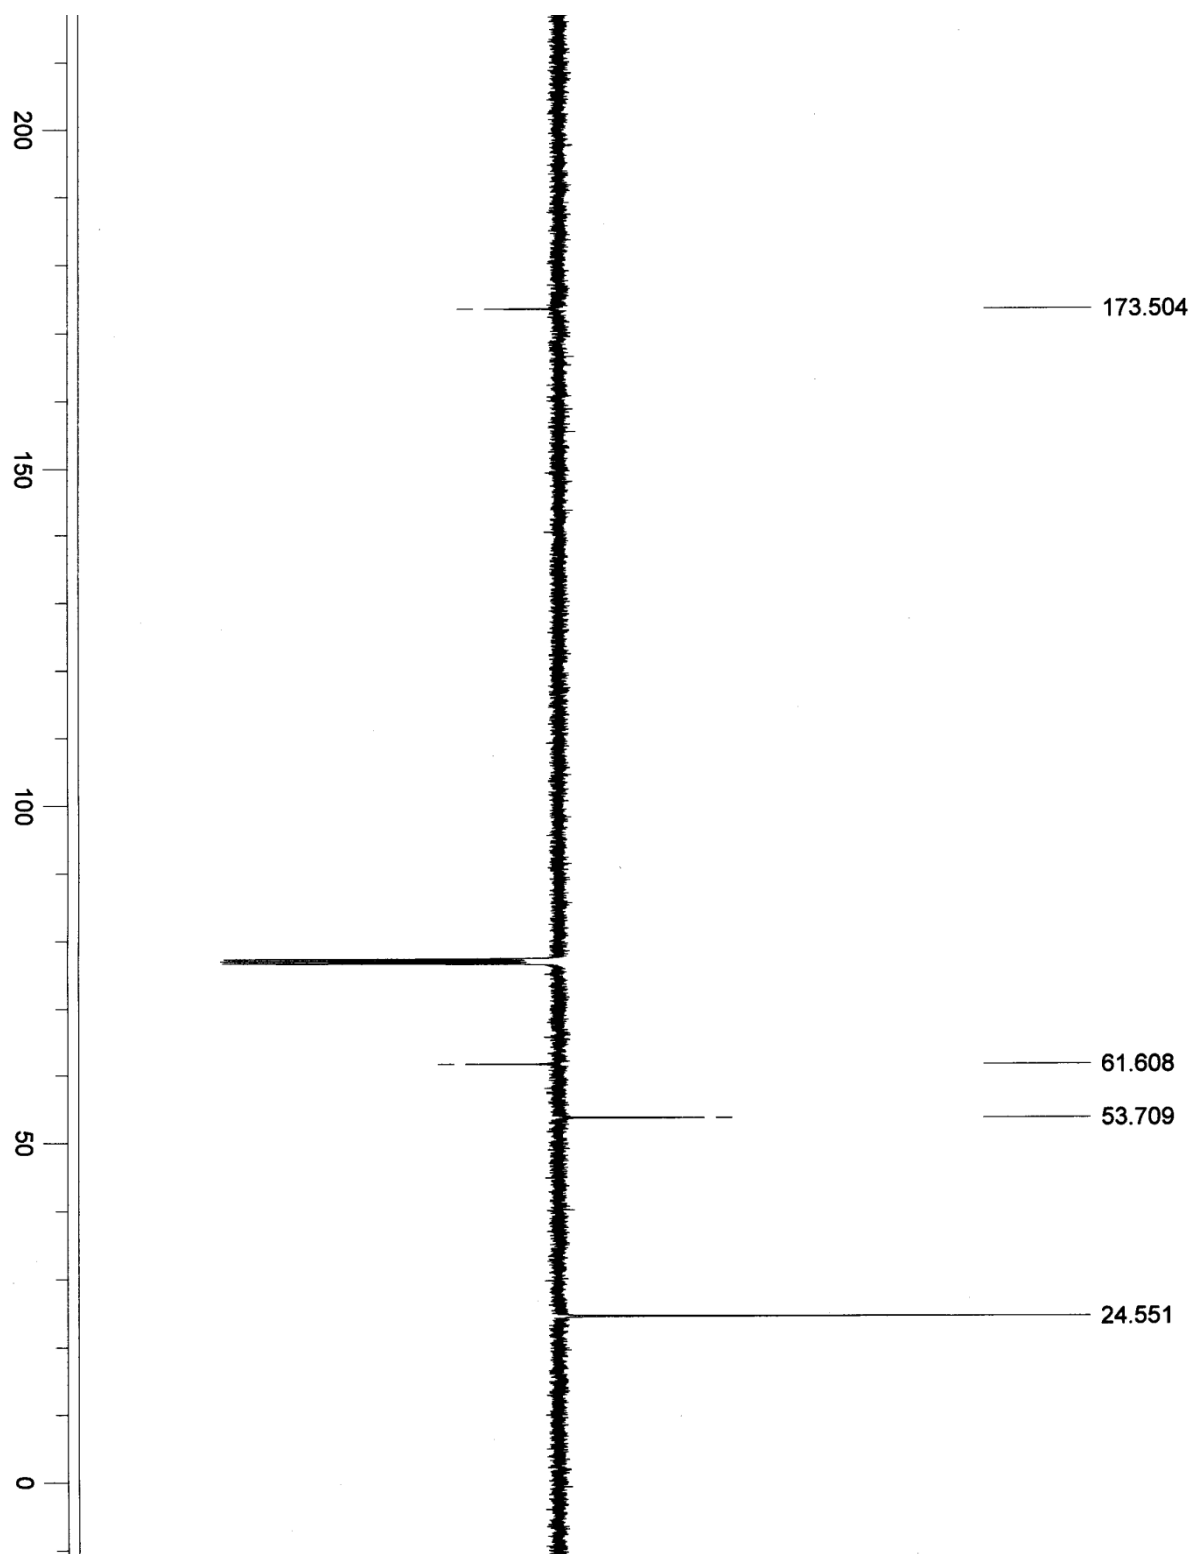

Methyl 2-[*N*-(*tert*-butyl)aminosulfonamido]-2-methylpropanoate (8): <sup>1</sup>H NMR

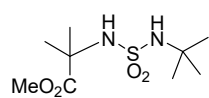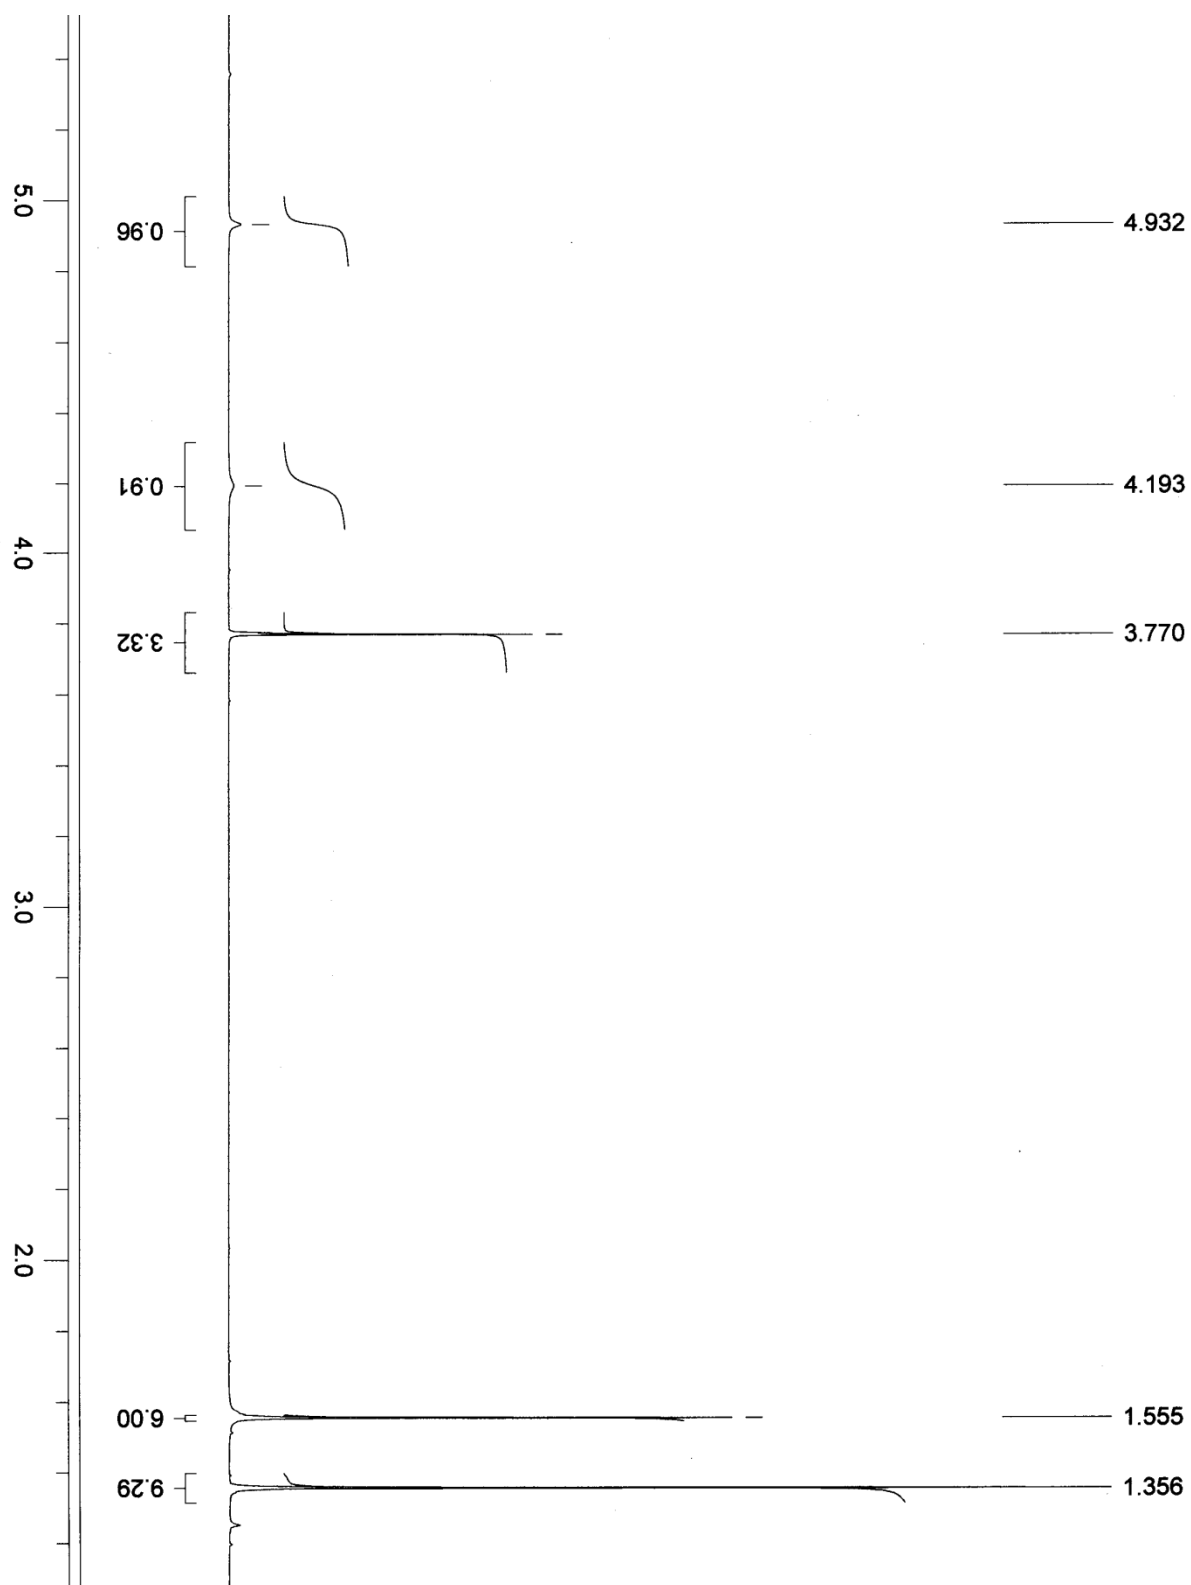

Methyl 2-[*N*-(*tert*-butyl)aminosulfonamido]-2-methylpropanoate (8):  $^{13}\text{C}$  NMR (APT)

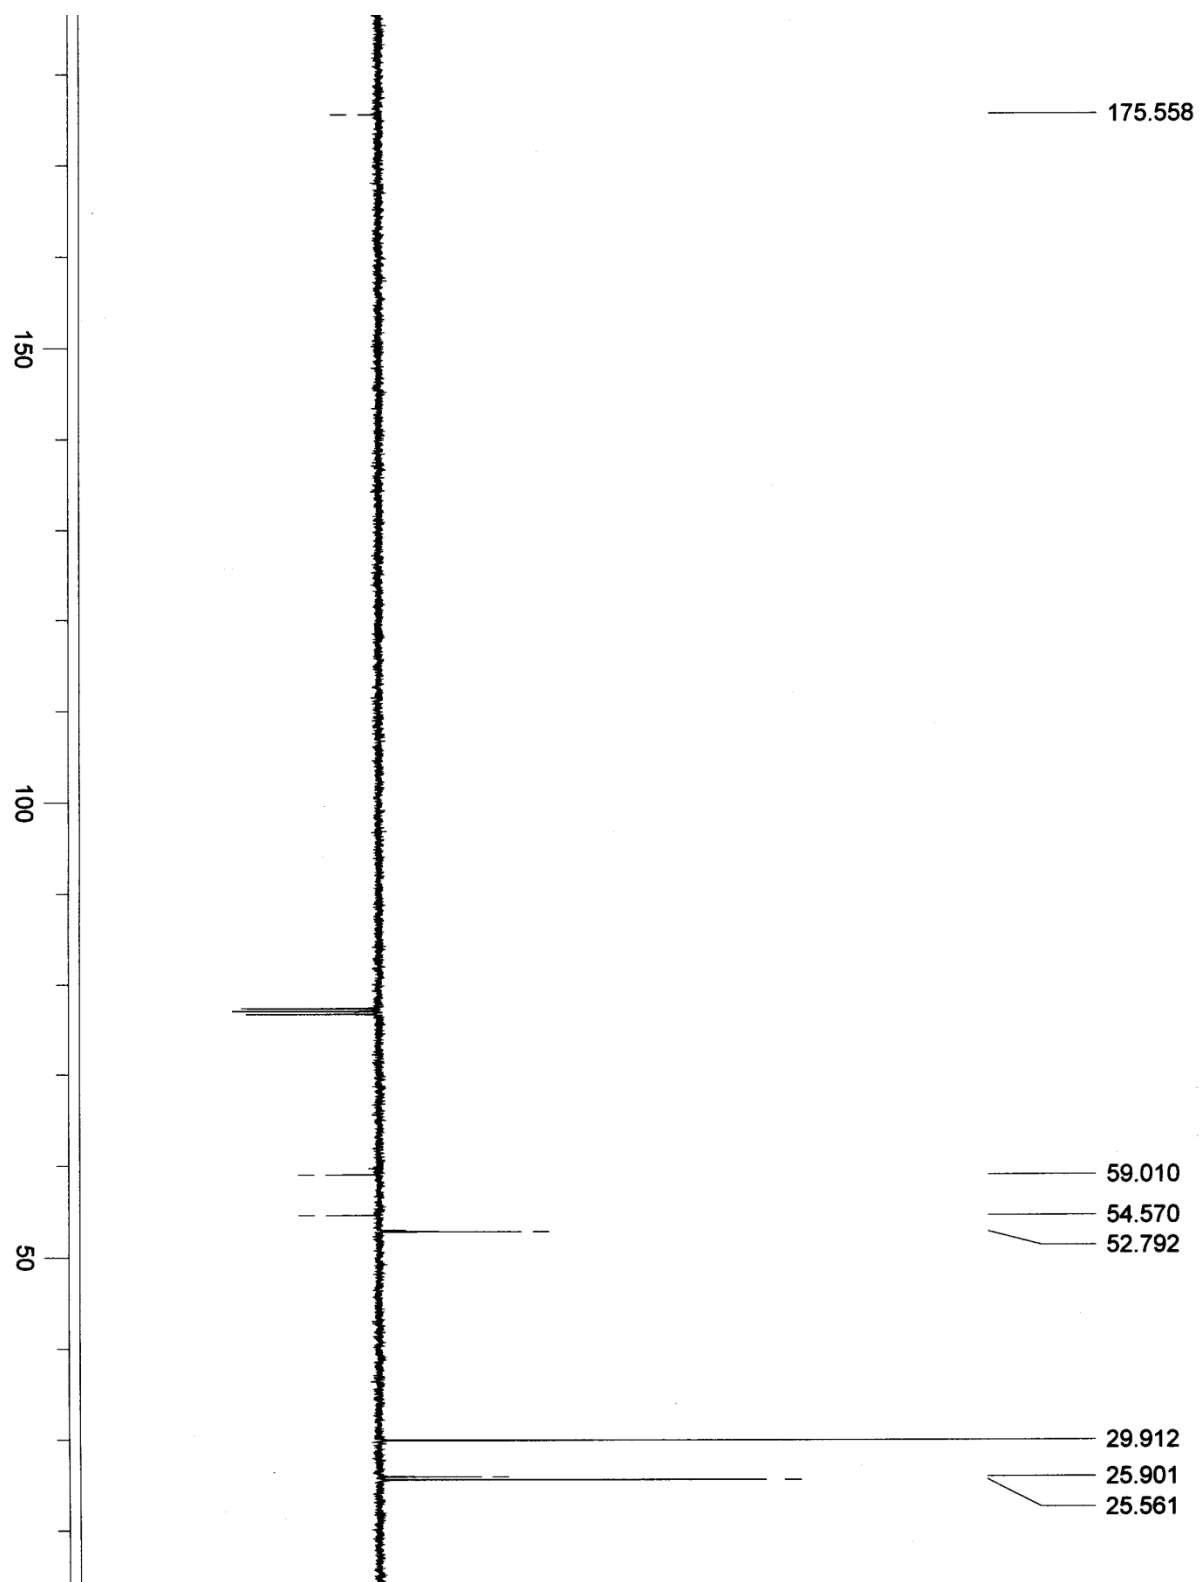

**(E)-Methyl 2-(2-tert-butyl-diazenyl)-2-methylpropanoate (7): <sup>1</sup>H NMR**

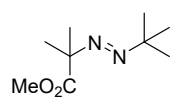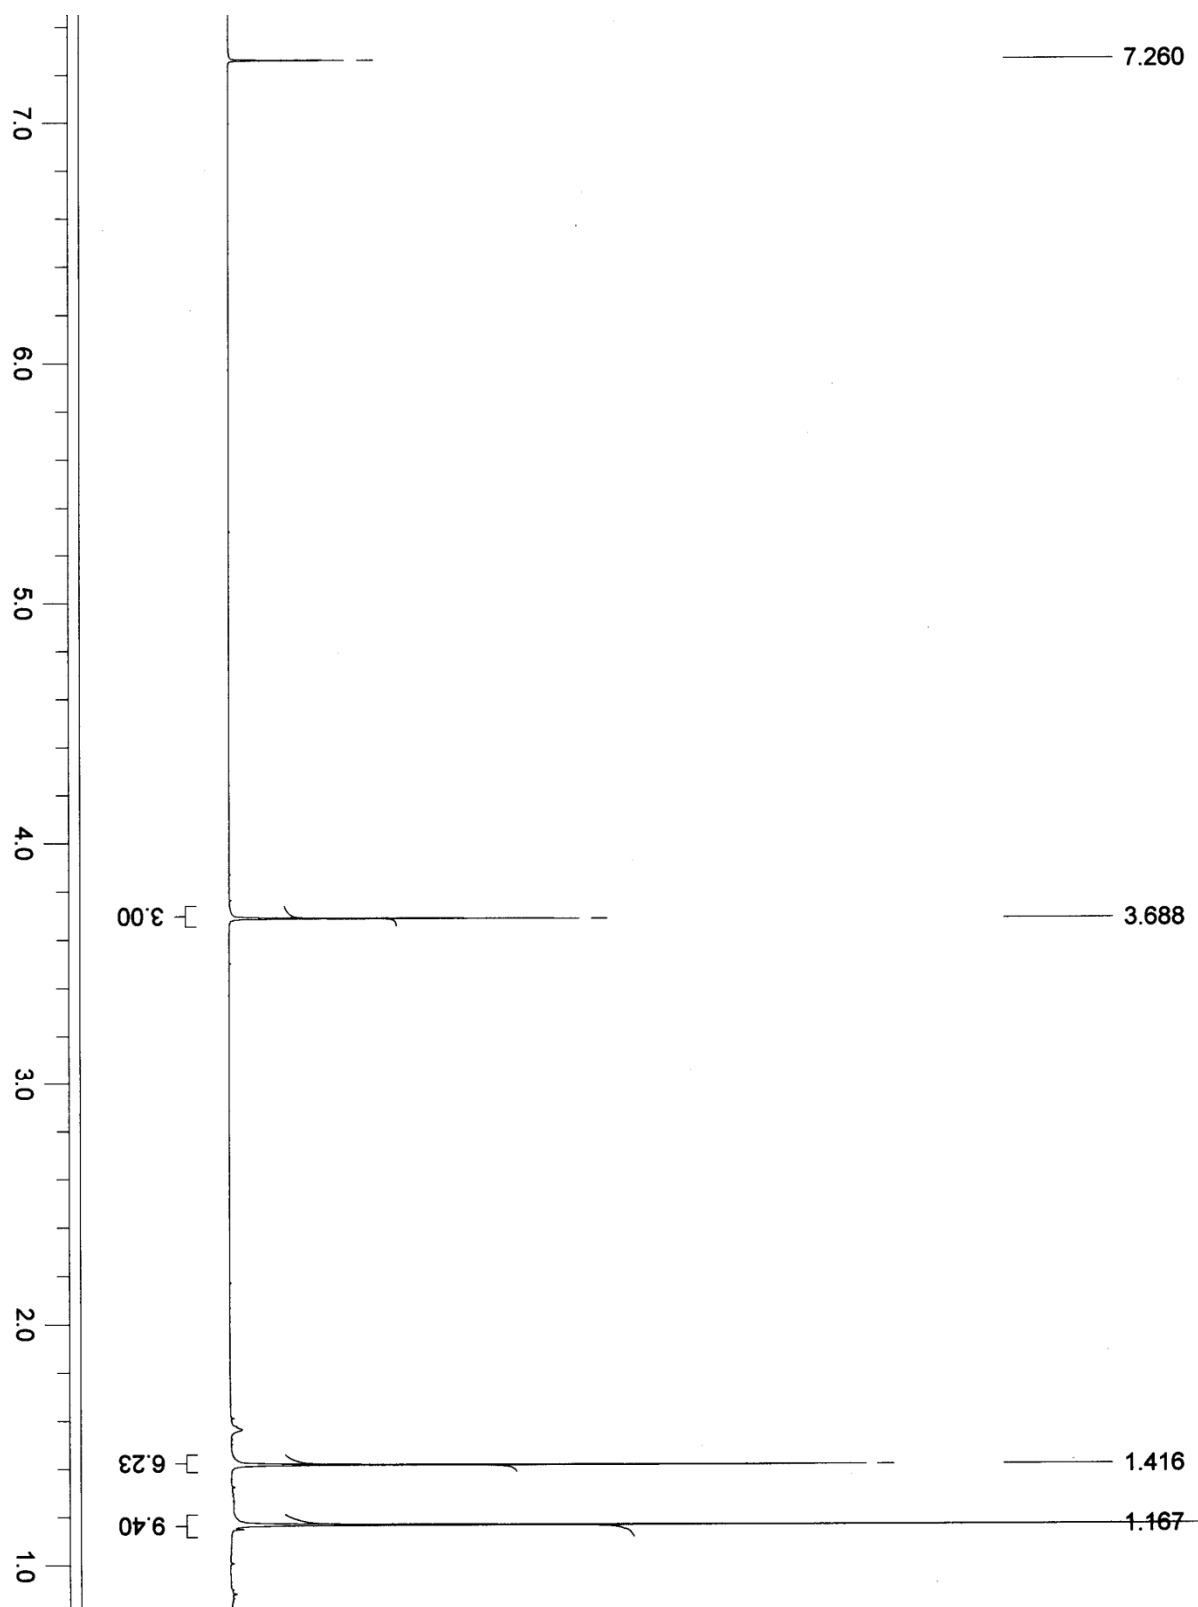

**(E)-Methyl 2-(2-tert-butyl-diazenyl)-2-methylpropanoate (7): <sup>13</sup>C NMR (APT)**

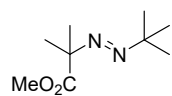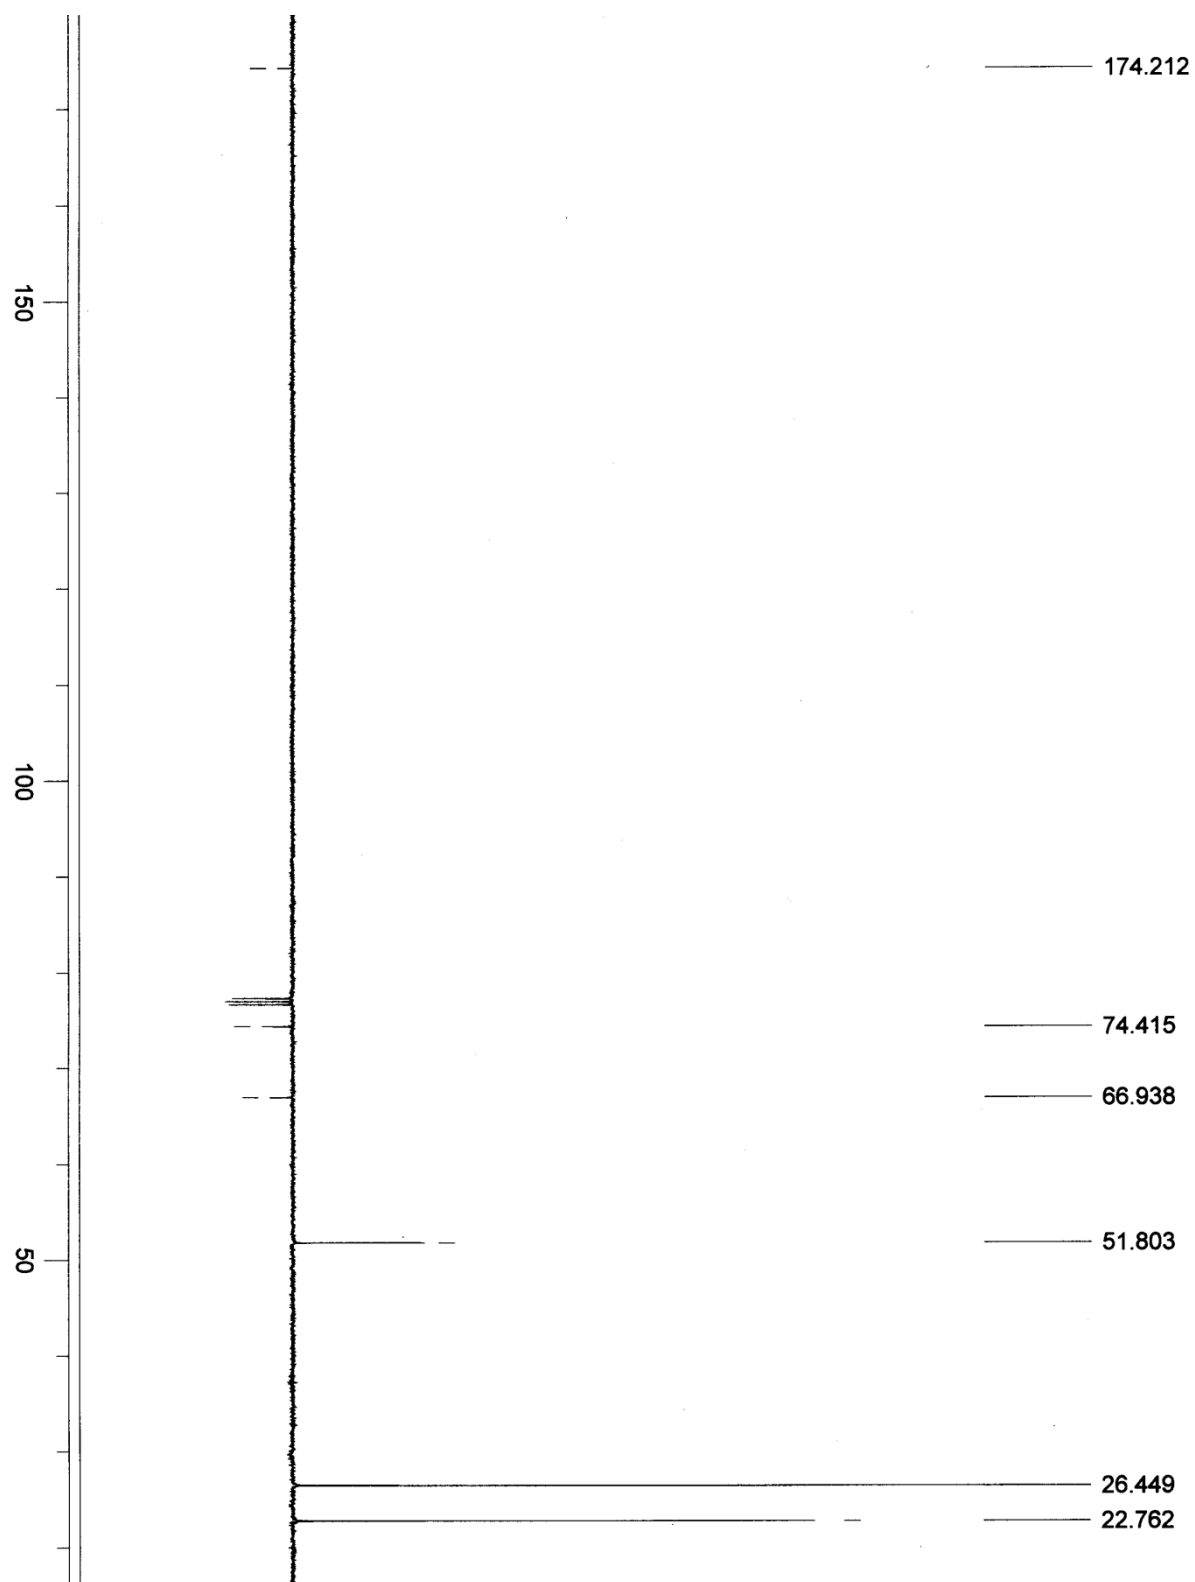



**(E)-2-(2-tert-Butyldiazenyl)-2-methylpropan-1-ol (6): <sup>1</sup>H NMR**

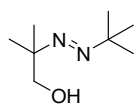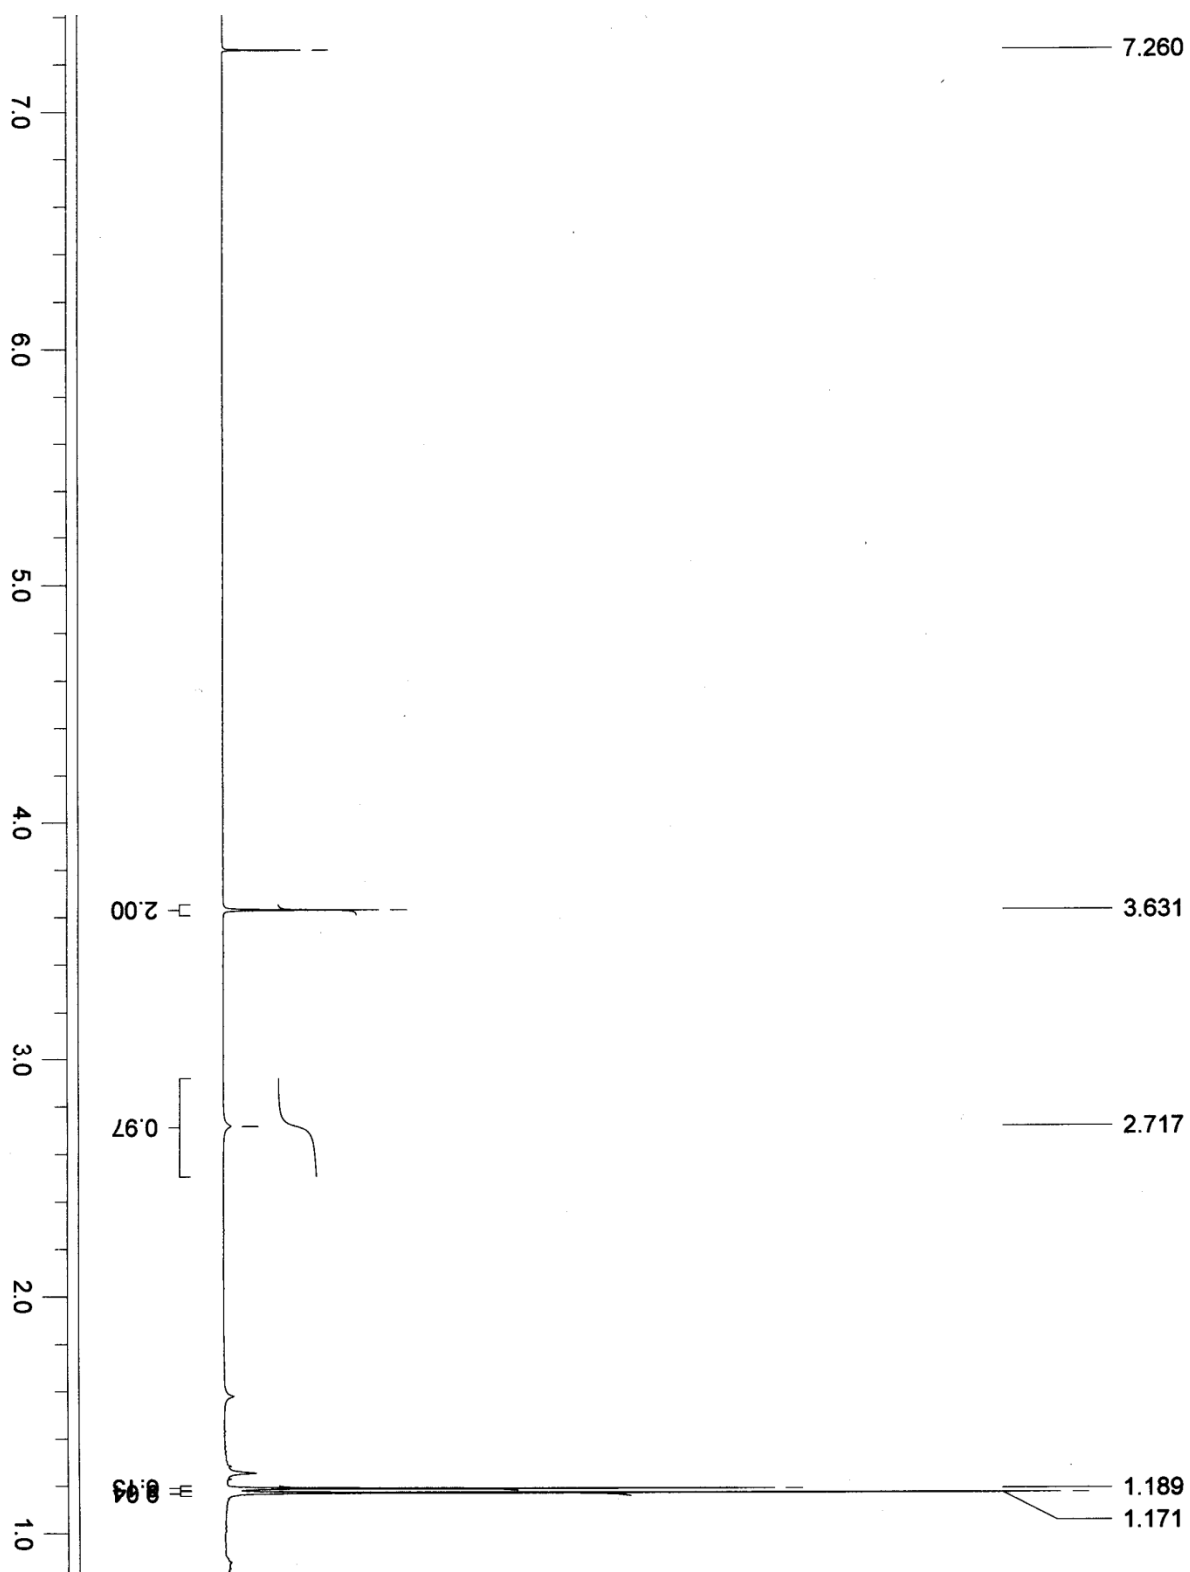

**(E)-2-(2-tert-Butyldiazenyl)-2-methylpropan-1-ol (6):  $^{13}\text{C}$  NMR (APT)**

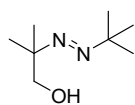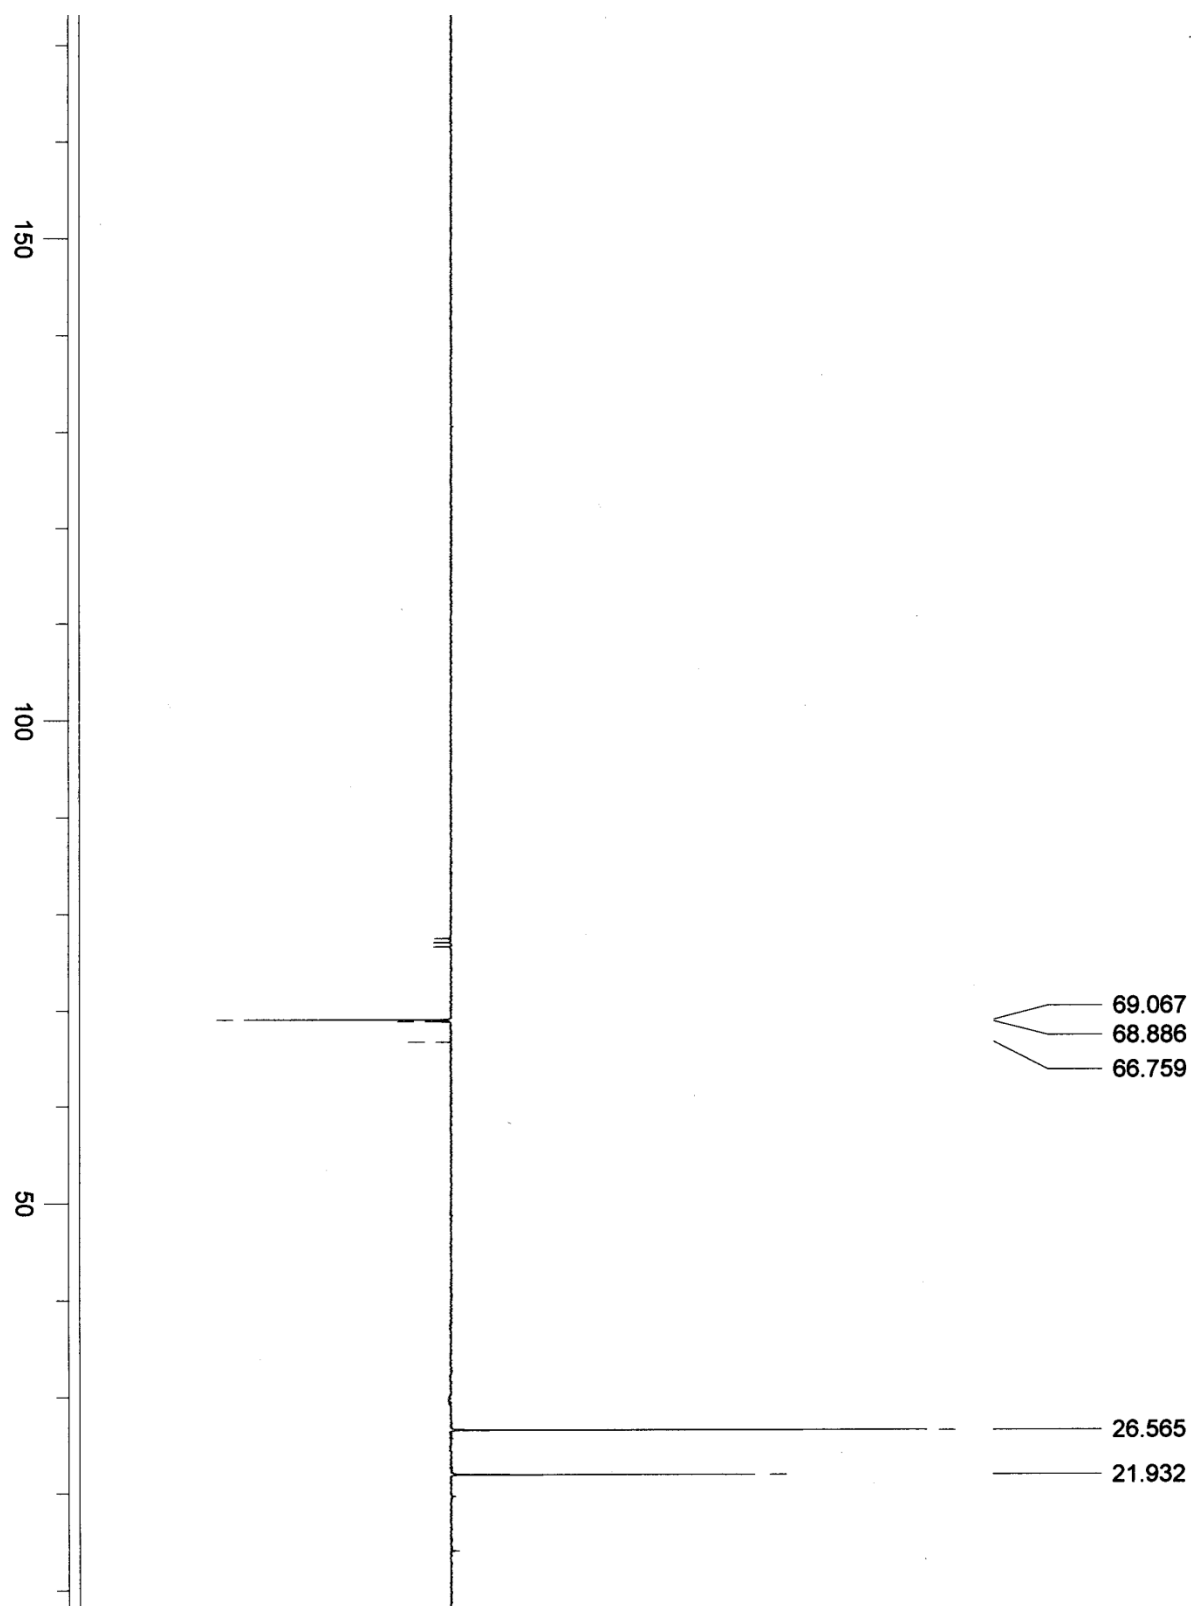

2-[(E)-2-[1-(Methansulfonyloxy)-2-methylpropan-2-yl]diazen-1-yl]-2-methyl propane

(5):  $^1\text{H NMR}$

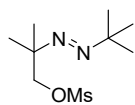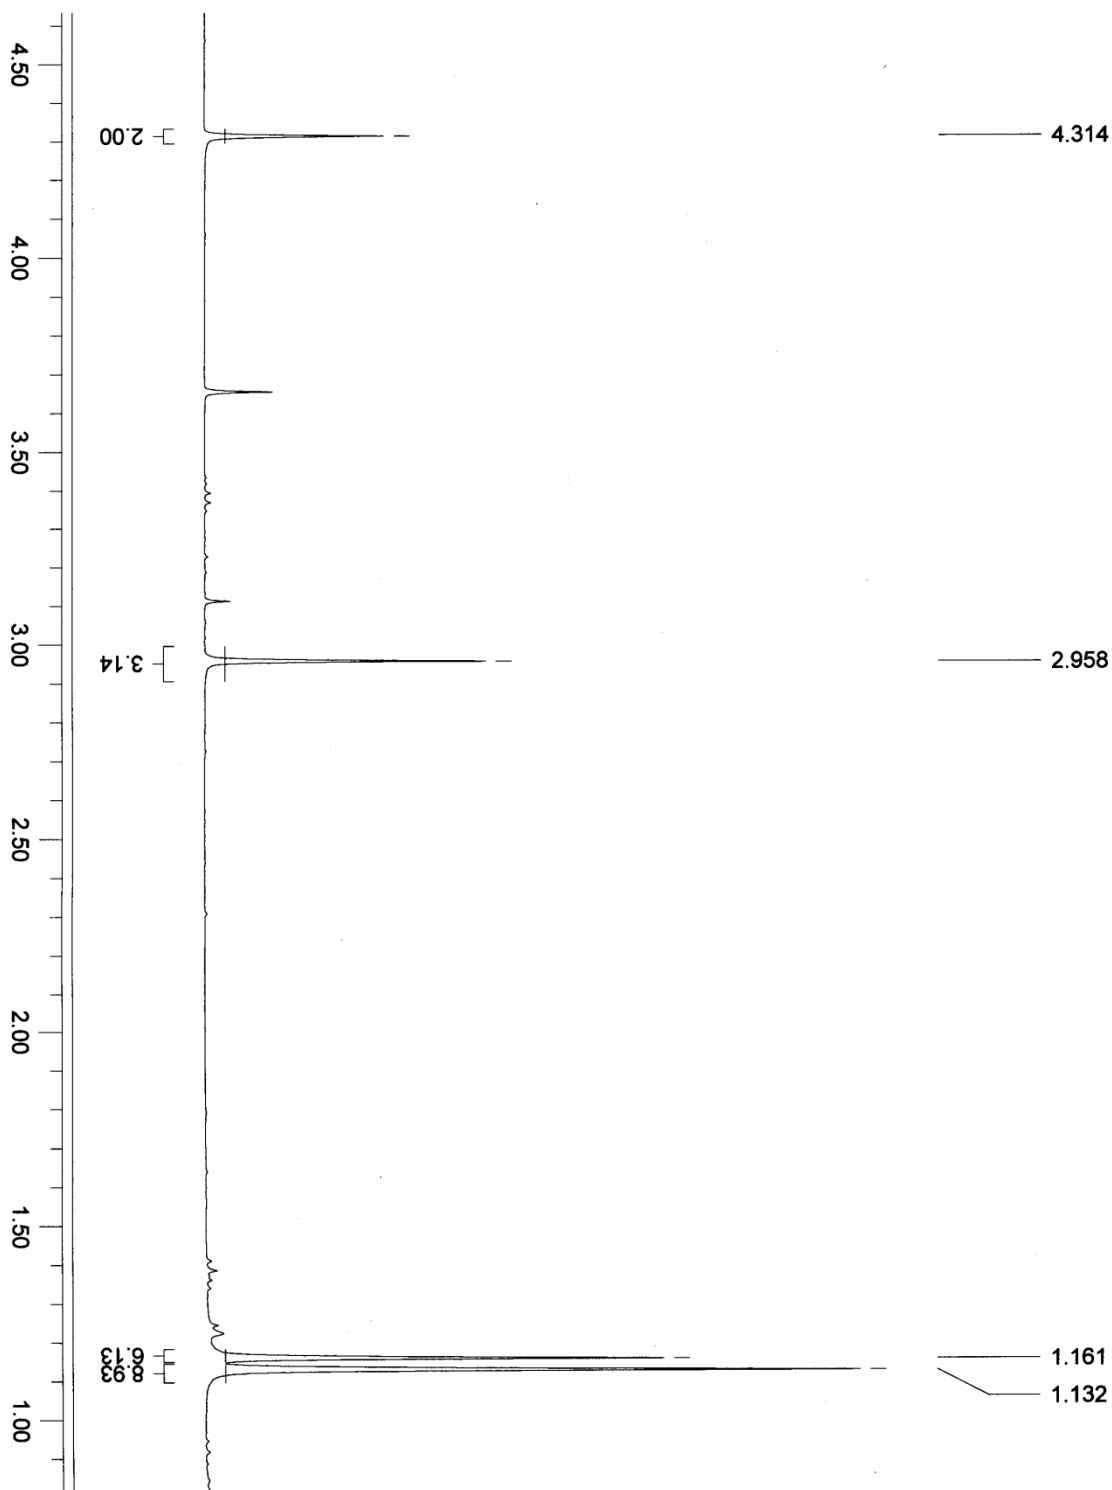

2-[(E)-2-[1-(Methansulfonyloxy)-2-methylpropan-2-yl]diazen-1-yl]-2-methyl propane

(5):  $^{13}\text{C}$  NMR (APT)

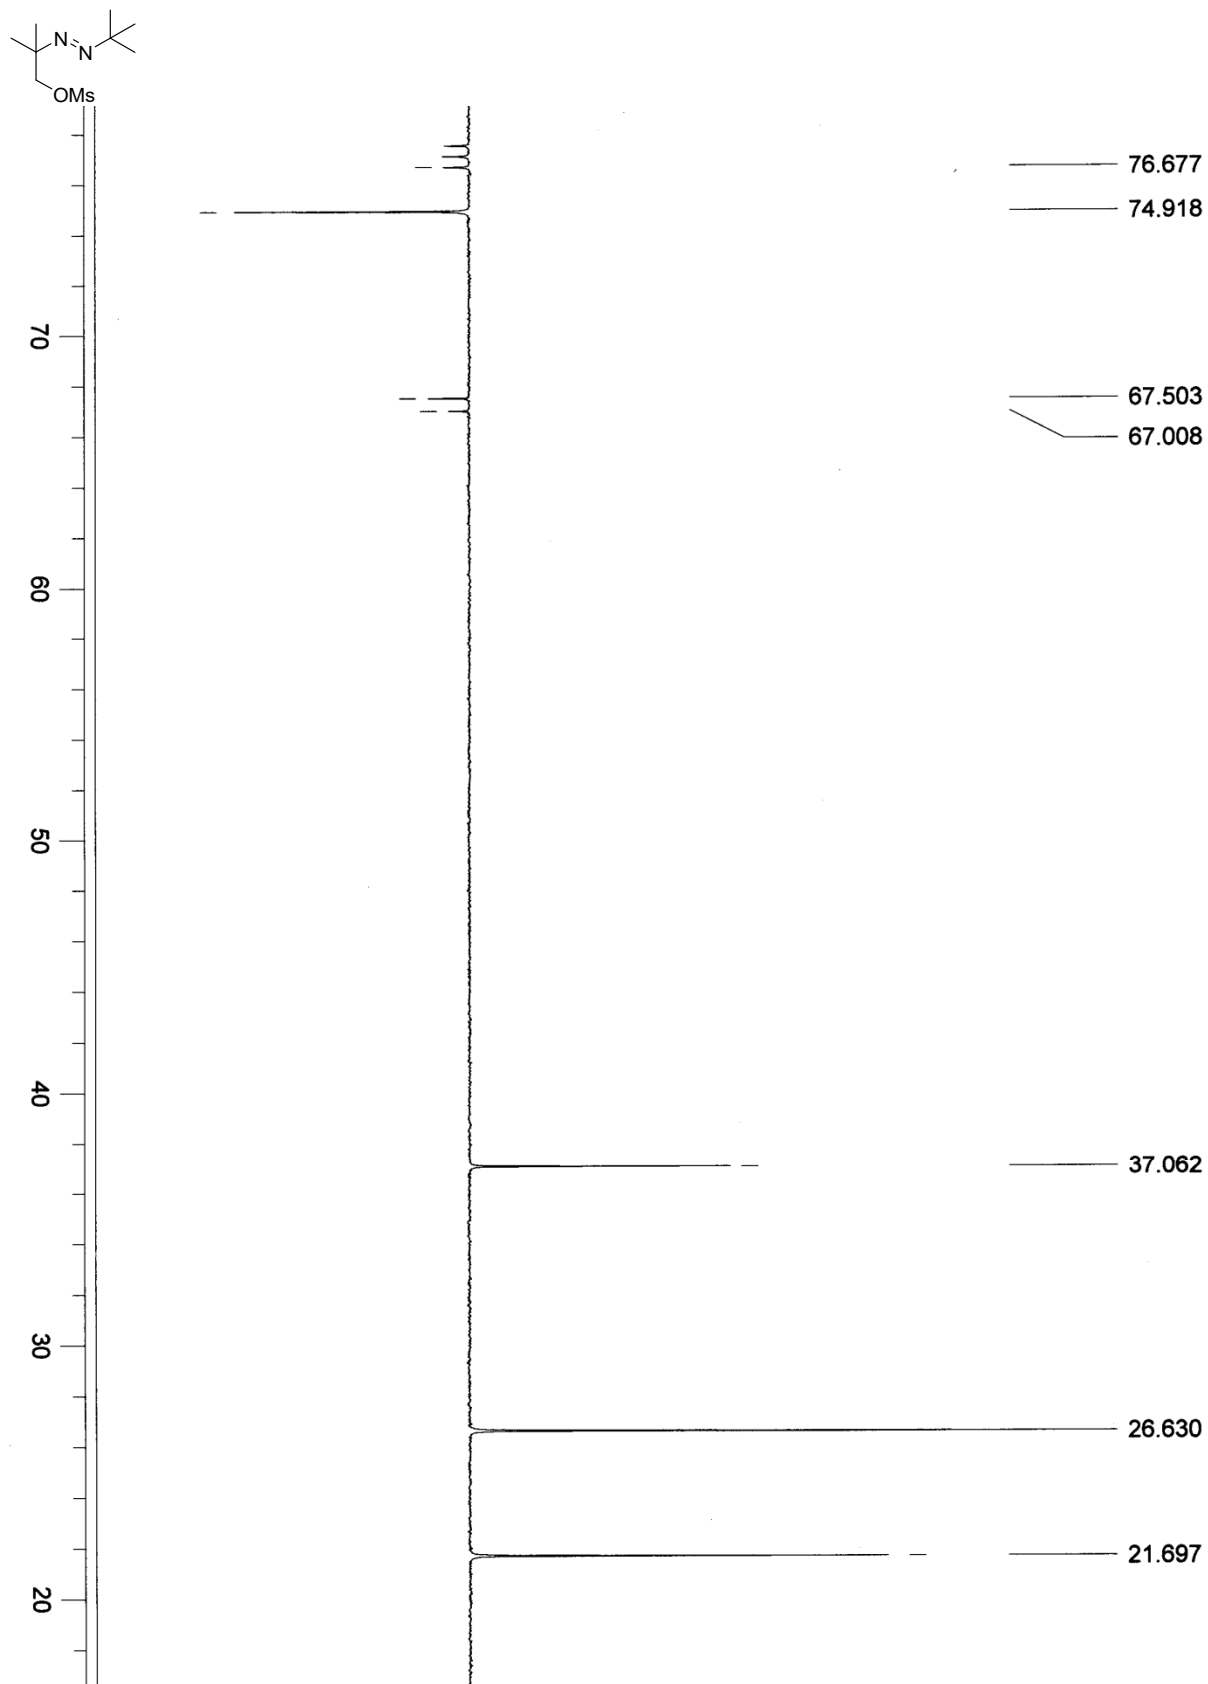

# 4-(Prop-2-en-1-yloxy)benzenethiol (4): <sup>1</sup>H NMR

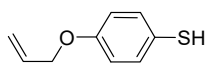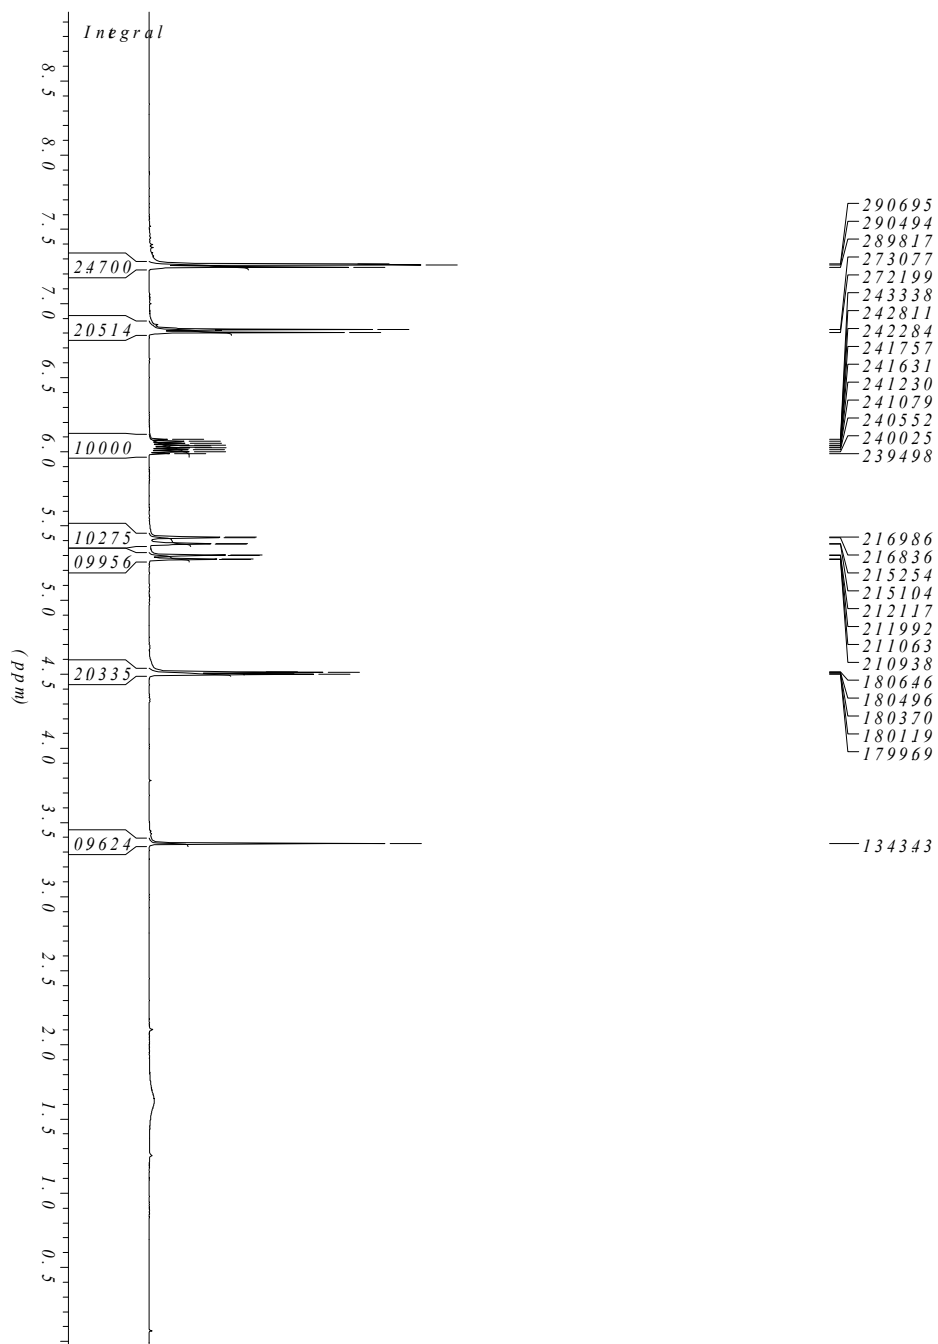

# 4-(Prop-2-en-1-yloxy)benzenethiol (4): $^{13}\text{C}$ NMR (APT)

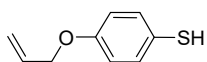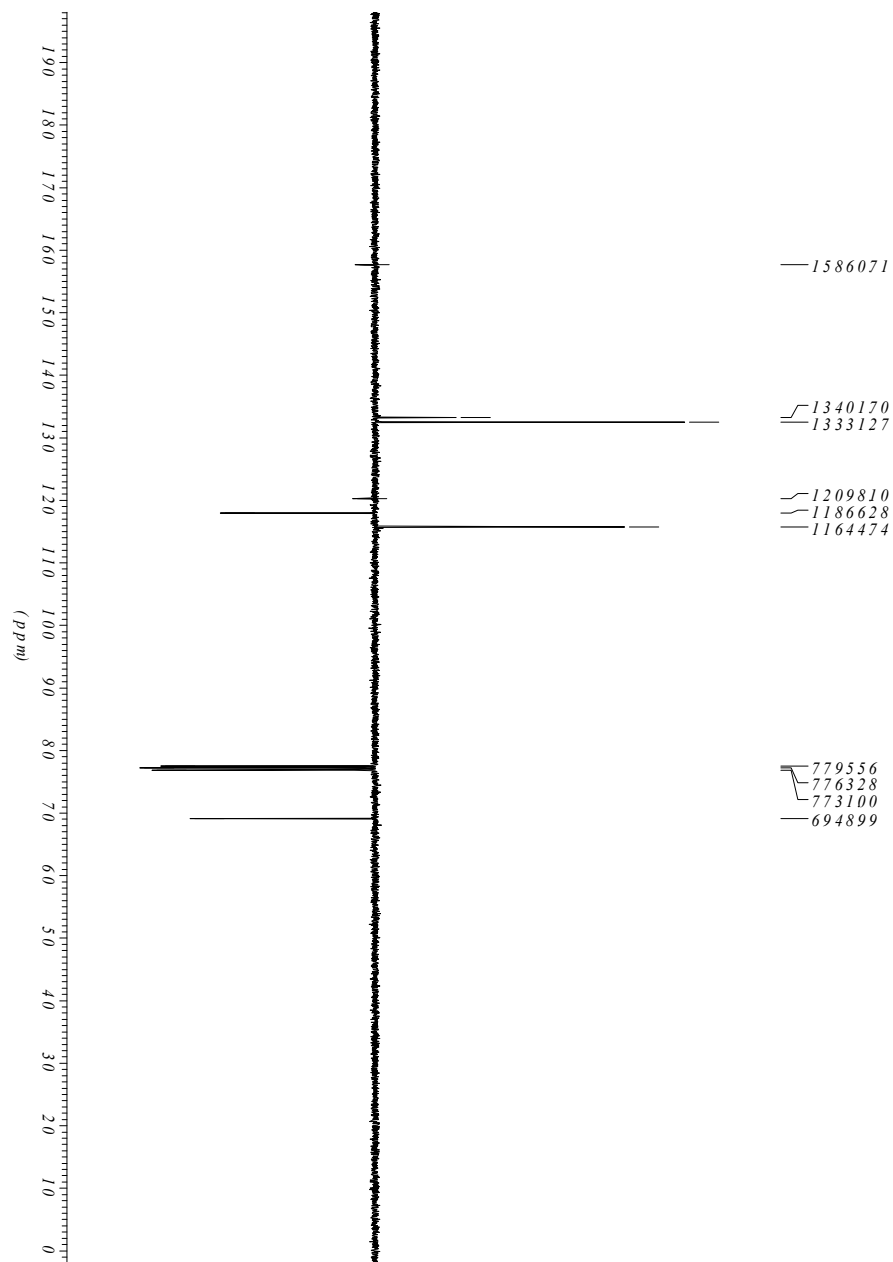

**(E)-2-(1-(4-(Allyloxy)phenylthio)-2-methylpropan-2-yl)-1-tert-butylidiazene (3): <sup>1</sup>H NMR**

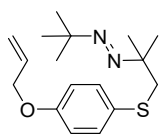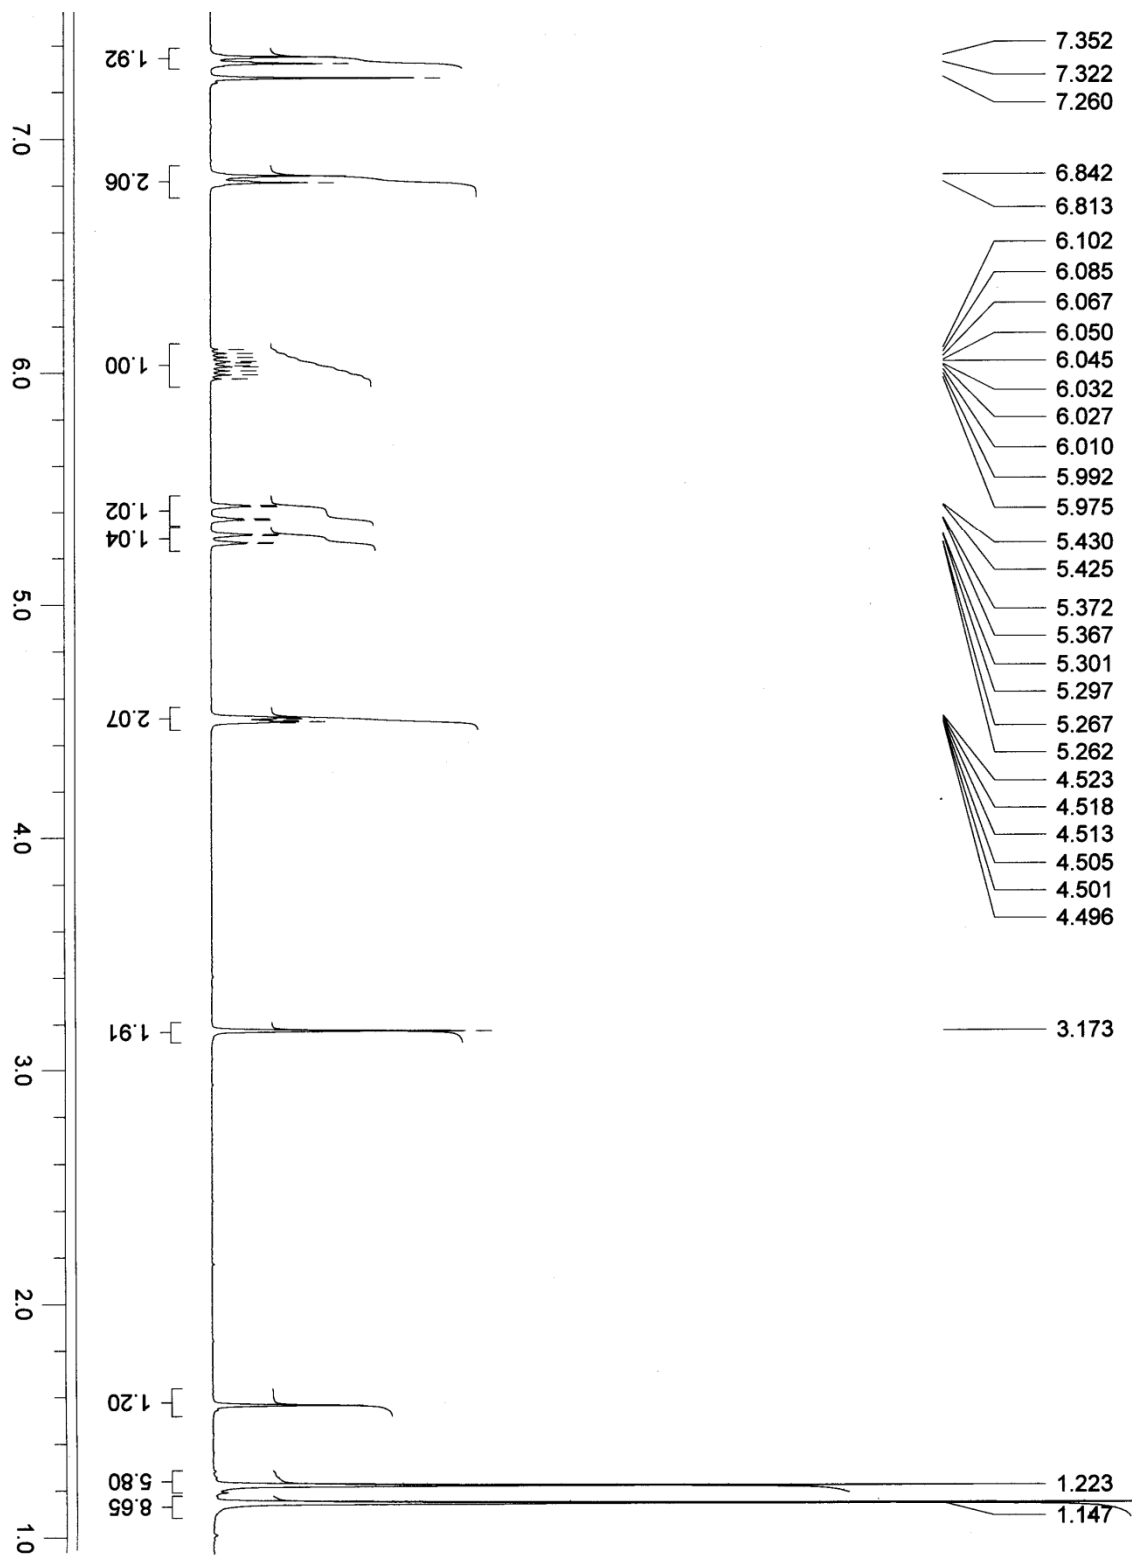

**(E)-2-(1-(4-(Allyloxy)phenylthio)-2-methylpropan-2-yl)-1-tert-butylidiazene (3): <sup>13</sup>C NMR (APT)**

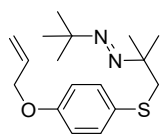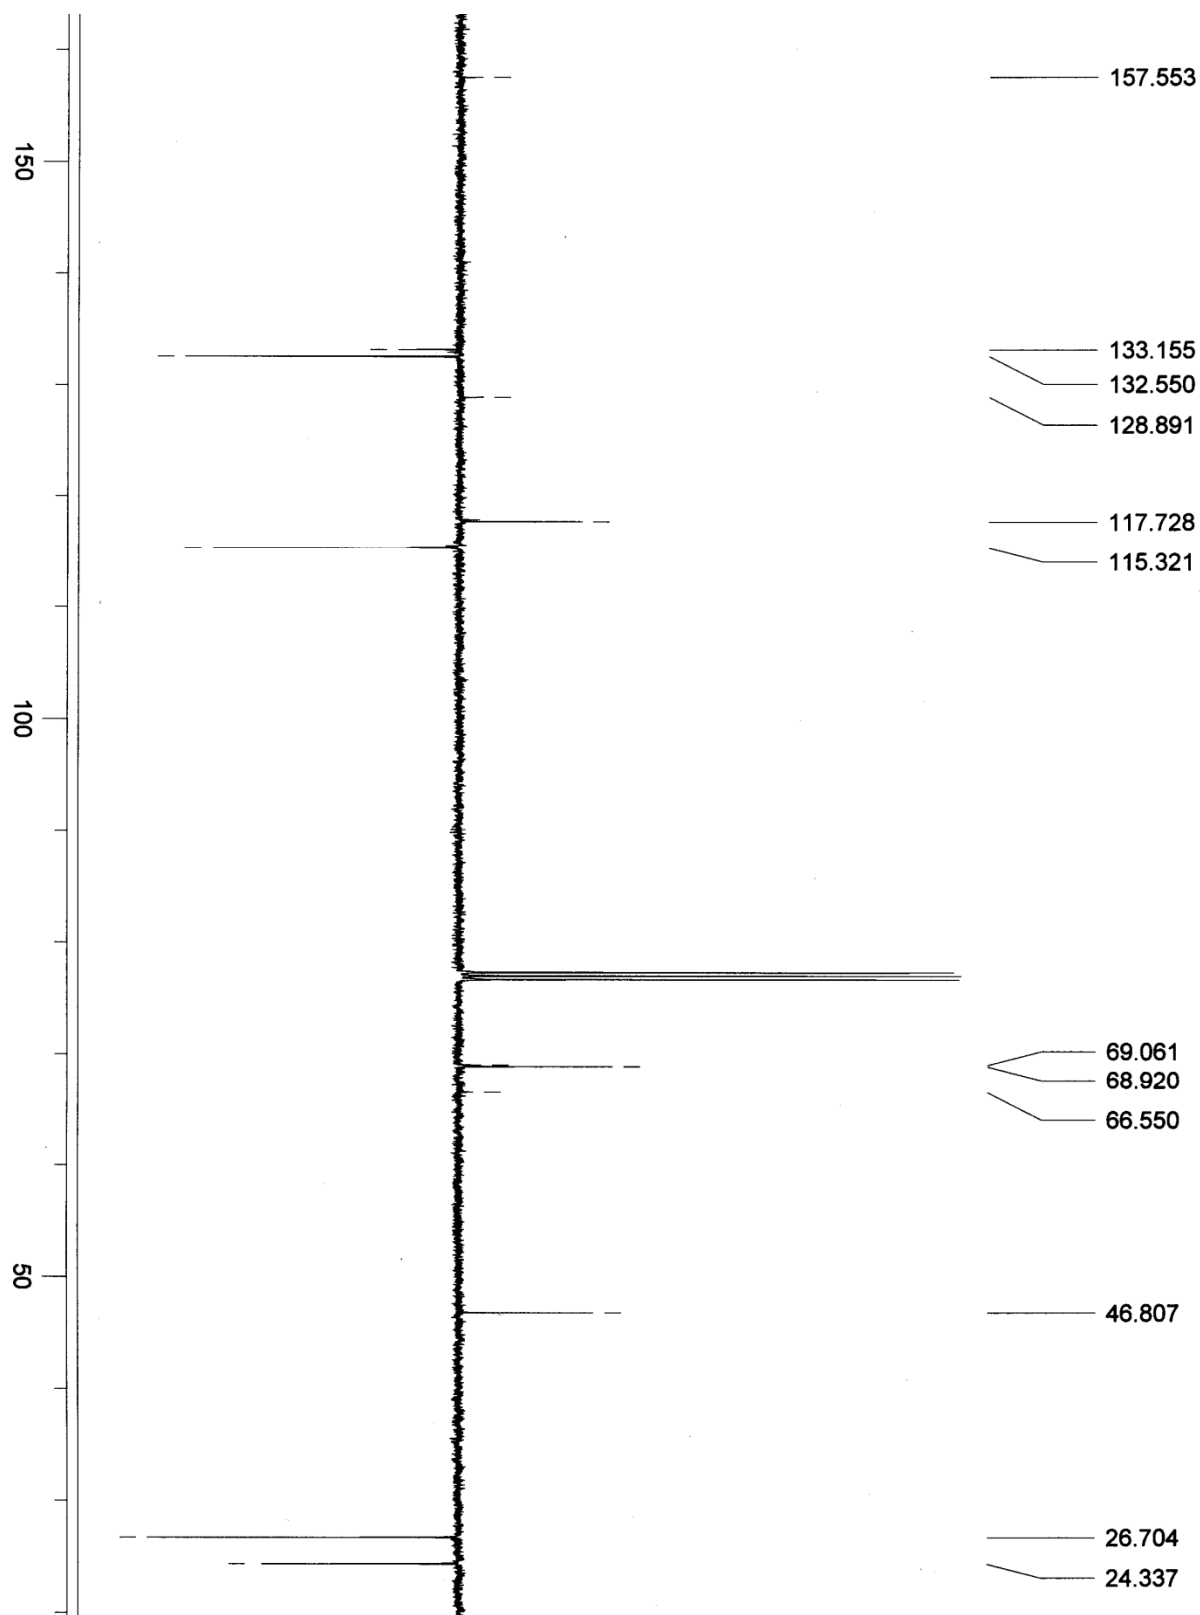



**(E)-2-(1-(4-(3-(Triethoxysilyl)propoxy)phenylthio)-2-methylpropan-2-yl)-1-tert-butylidiazene (1):**  
<sup>1</sup>H NMR

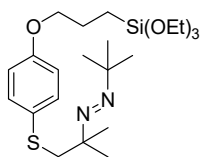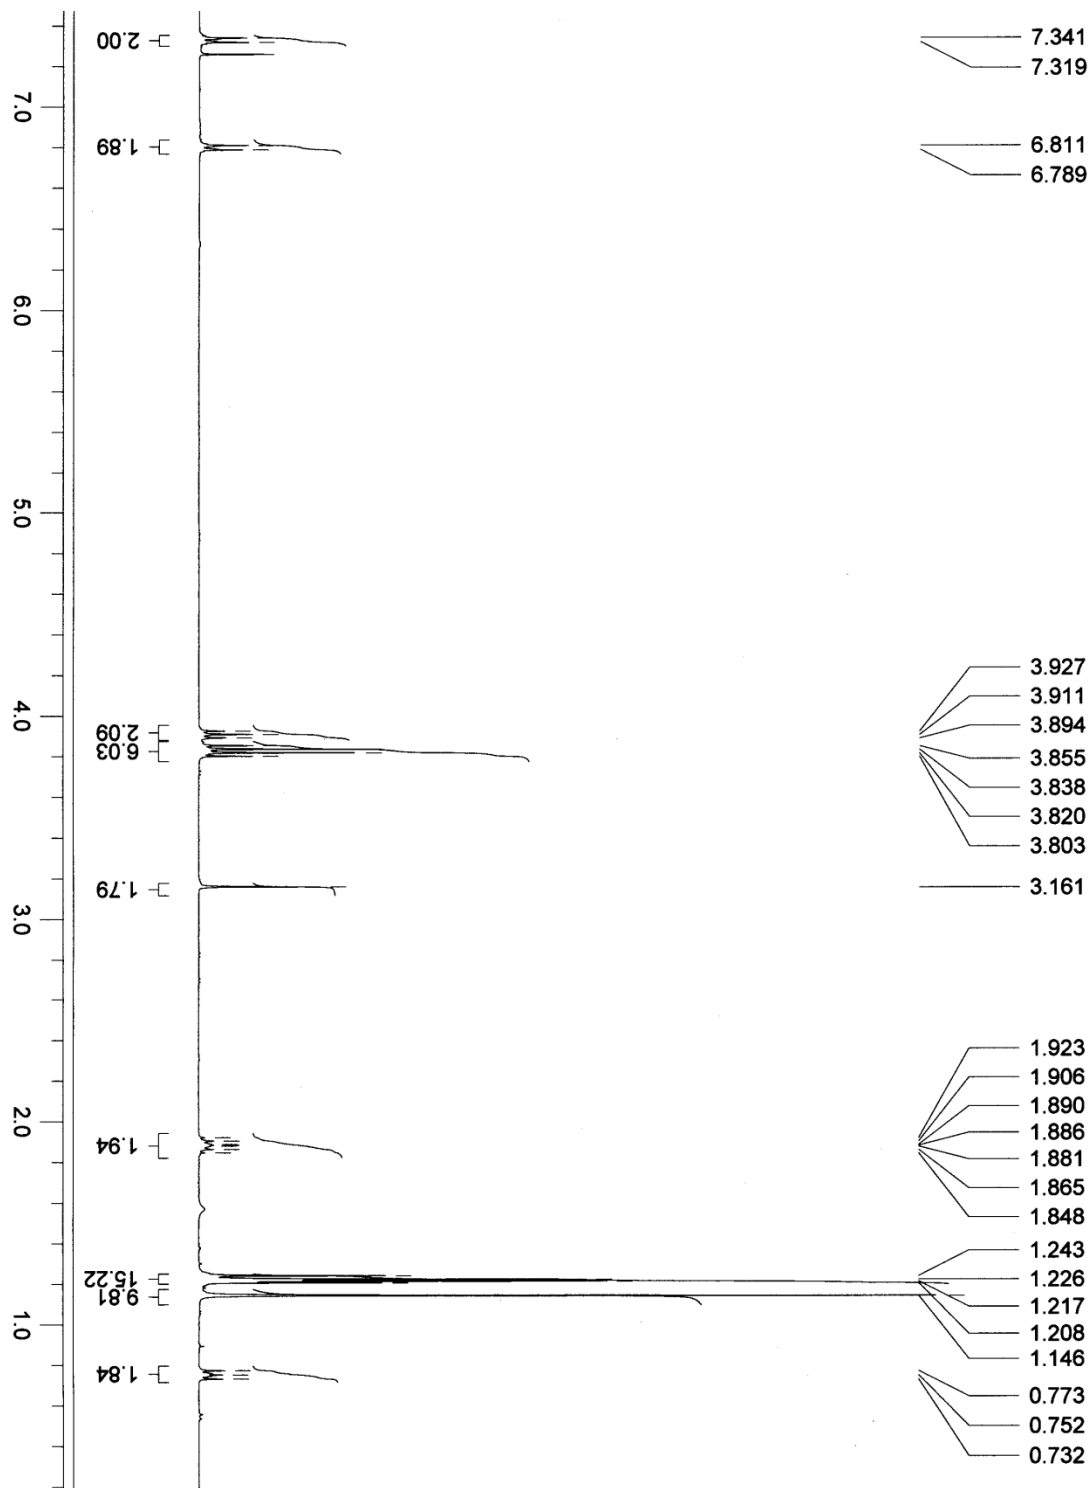

**(E)-2-(1-(4-(3-(Triethoxysilyl)propoxy)phenylthio)-2-methylpropan-2-yl)-1-tert-butylidiazene (1):**  
<sup>13</sup>C NMR (APT)

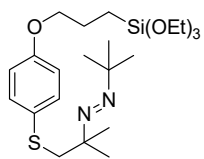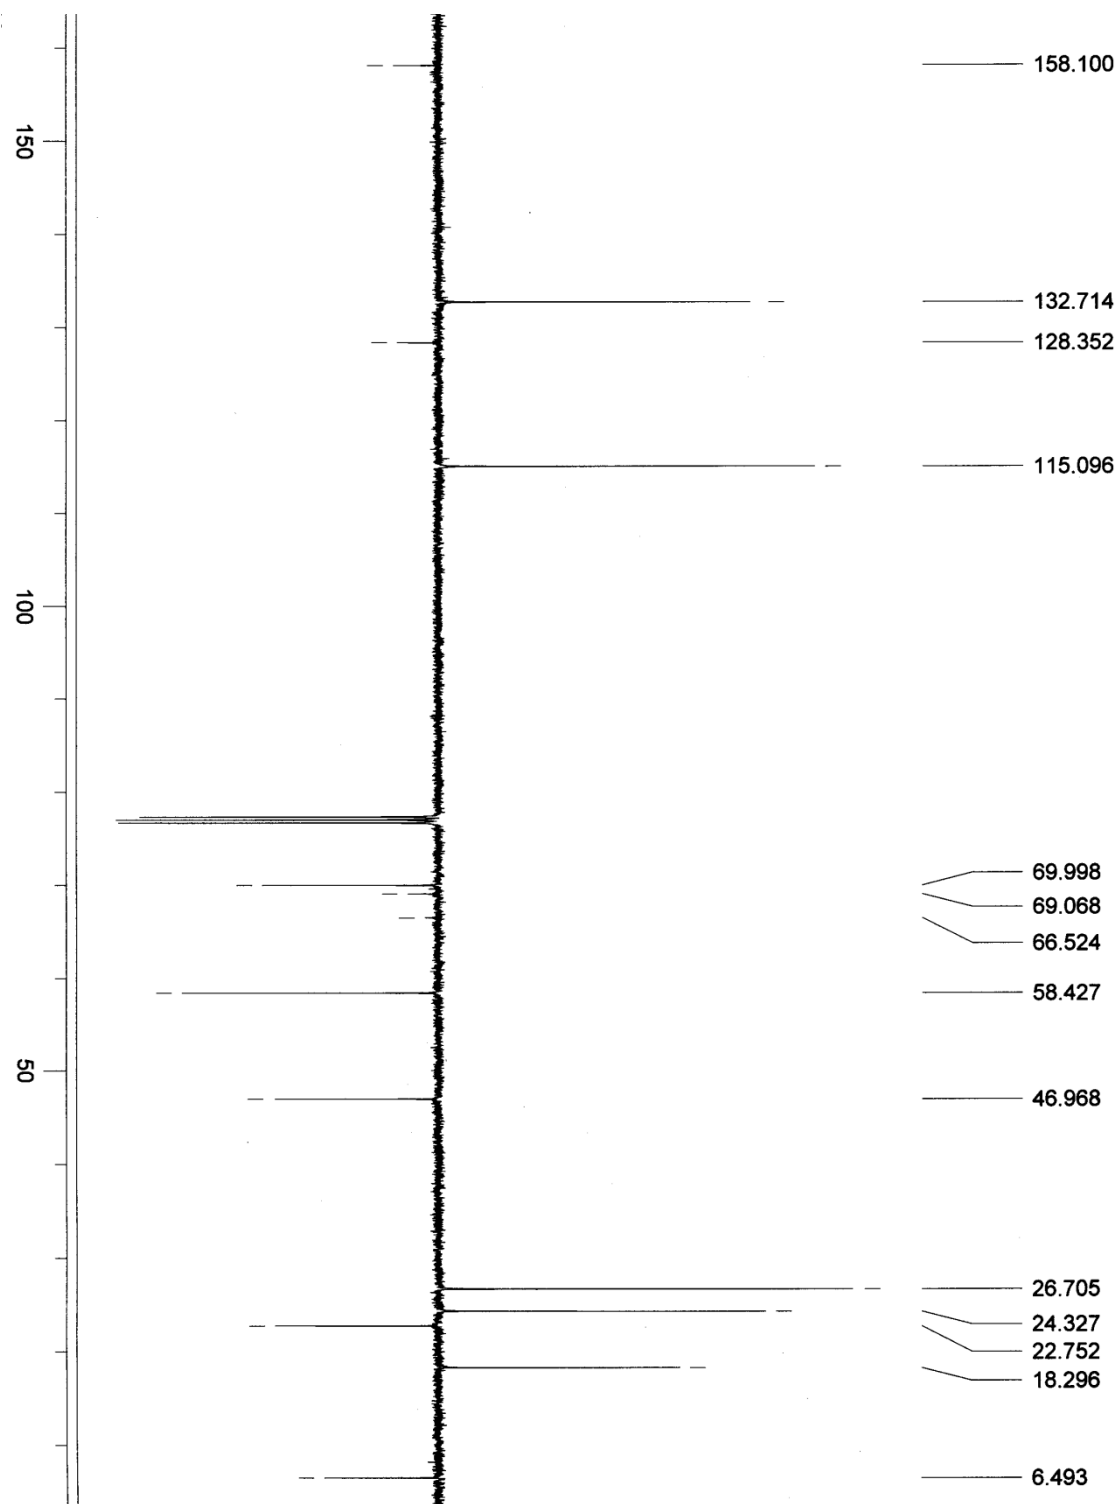

### Small Angle X-Ray Scattering (SAXS): SBA<sub>27</sub>-1, SBA<sub>47</sub>-1, SBA<sub>190</sub>-1.

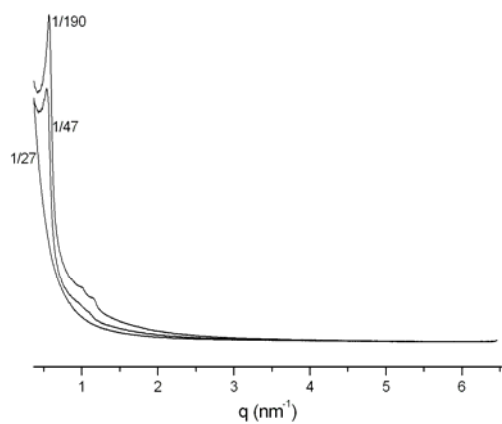

### Nitrogen adsorption/desorption analysis: SBA<sub>27</sub>-1

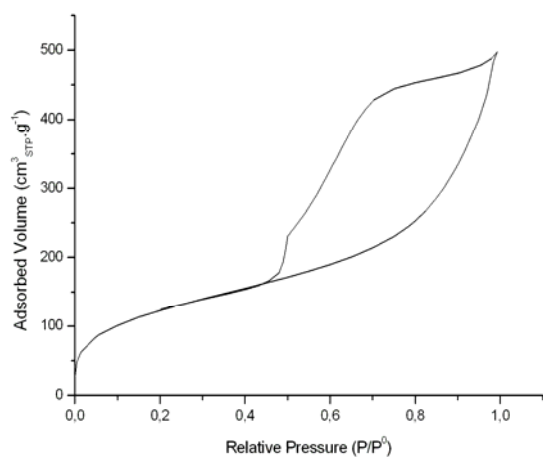

### Nitrogen adsorption/desorption analysis: SBA<sub>47</sub>-1

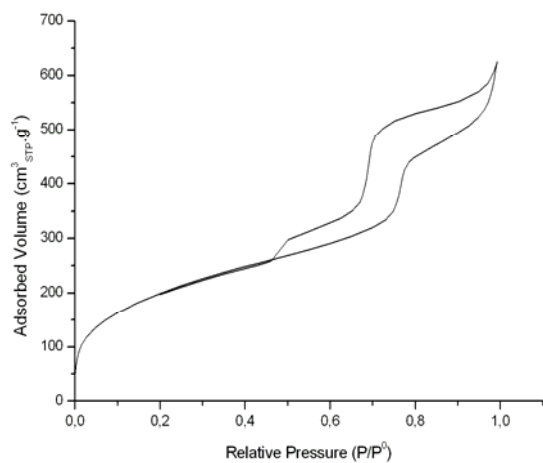

## Nitrogen adsorption/desorption analysis: SBA<sub>190</sub>-1

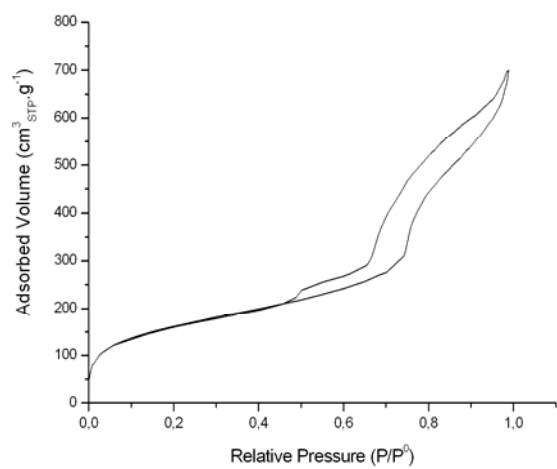

**<sup>13</sup>C CP-MAS solid state NMR of SBA<sub>27</sub>-1:**

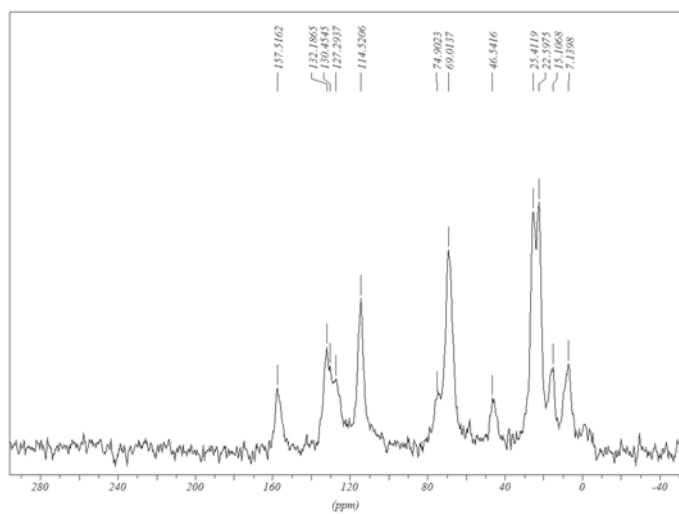

**<sup>29</sup>Si CP-MAS solid state NMR of SBA<sub>27</sub>-1:**

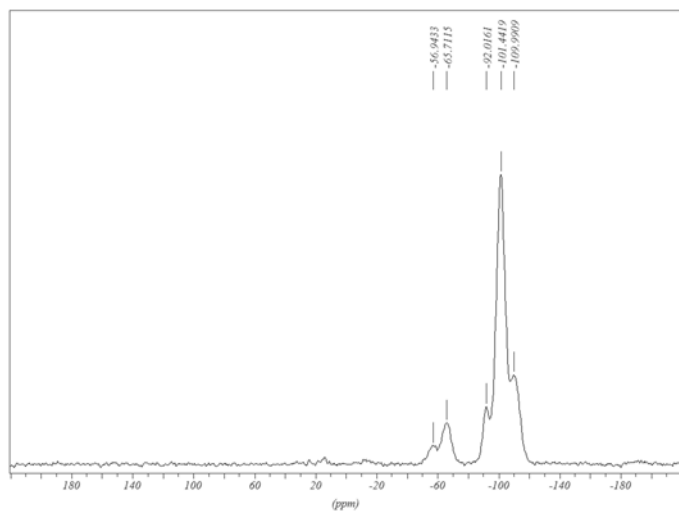

**<sup>13</sup>C CP-MAS solid state NMR of SBA<sub>47</sub>-1:**

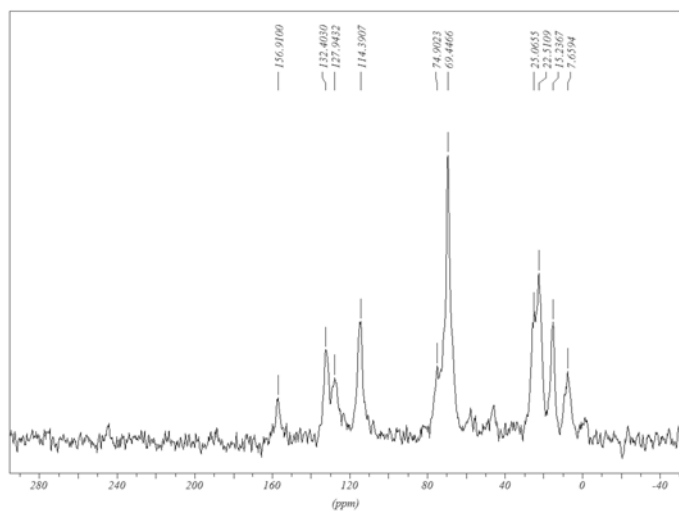

**<sup>29</sup>Si CP-MAS solid state NMR of SBA<sub>47</sub>-1:**

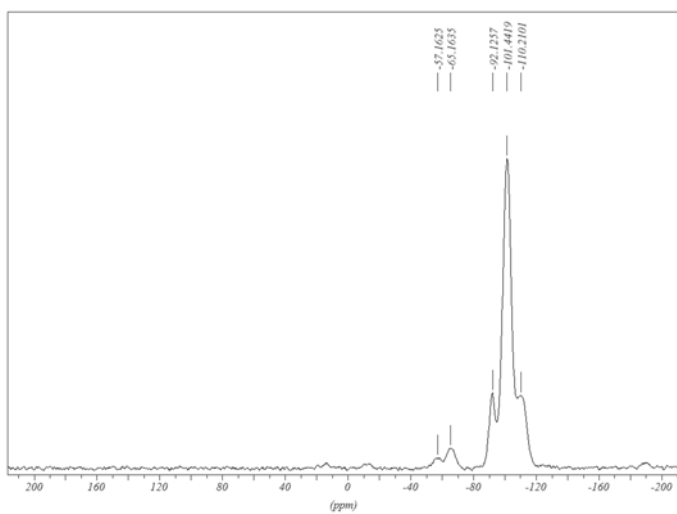

**<sup>13</sup>C CP-MAS solid state NMR of SBA<sub>190</sub>-1:**

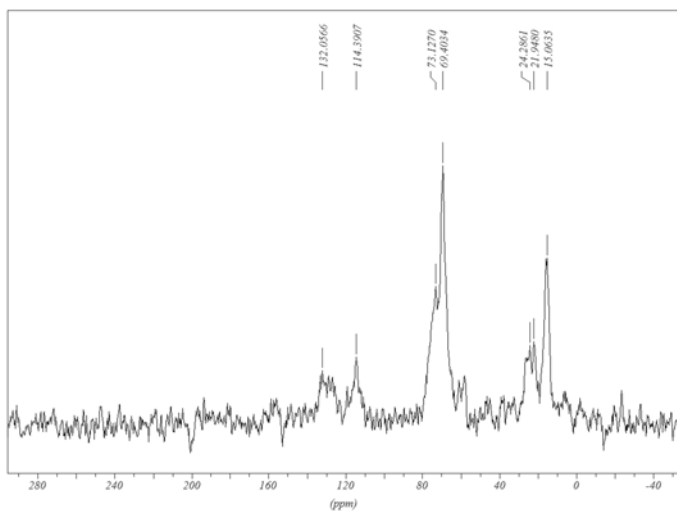

**<sup>29</sup>Si CP-MAS solid state NMR of SBA<sub>190</sub>-1:**

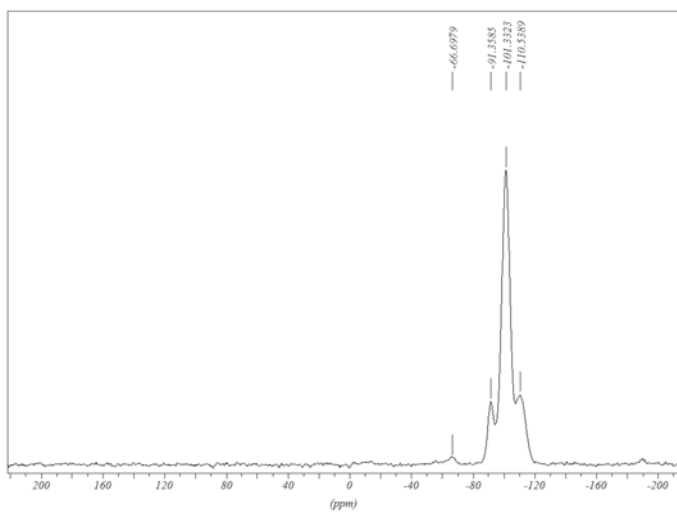

**TGA for SBA<sub>27</sub>-1, SBA<sub>47</sub>-1, SBA<sub>190</sub>-1:**

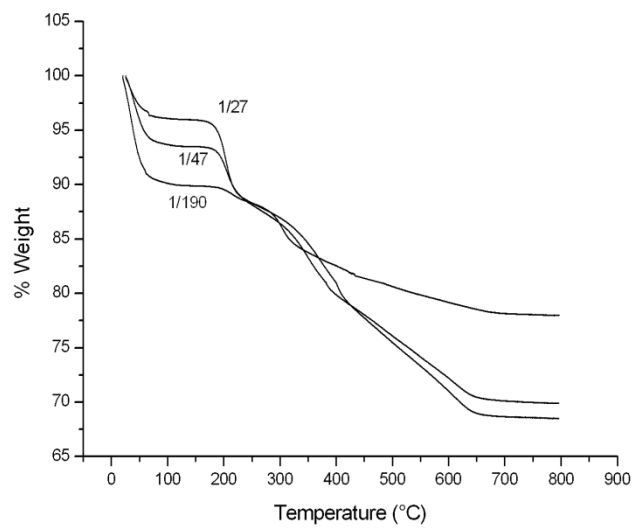

**TEM for SBA<sub>27</sub>-1**

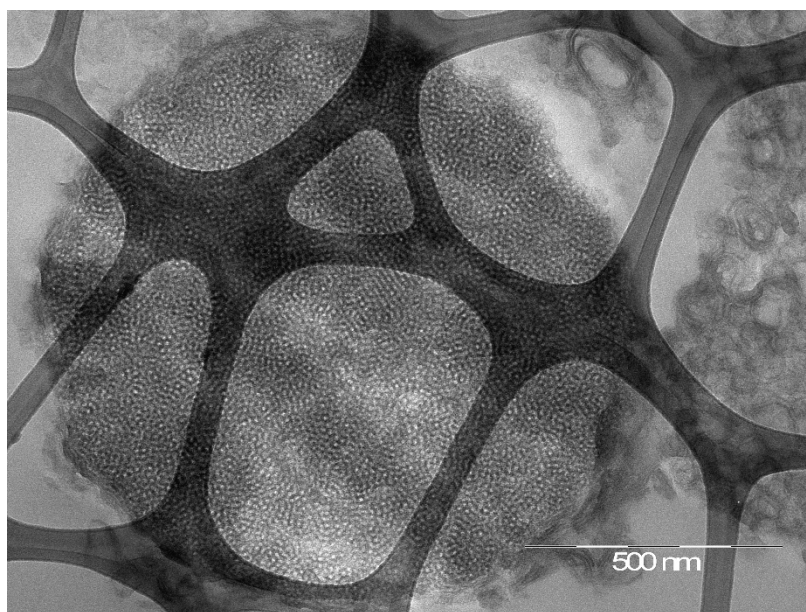

**TEM for SBA<sub>47</sub>-1**

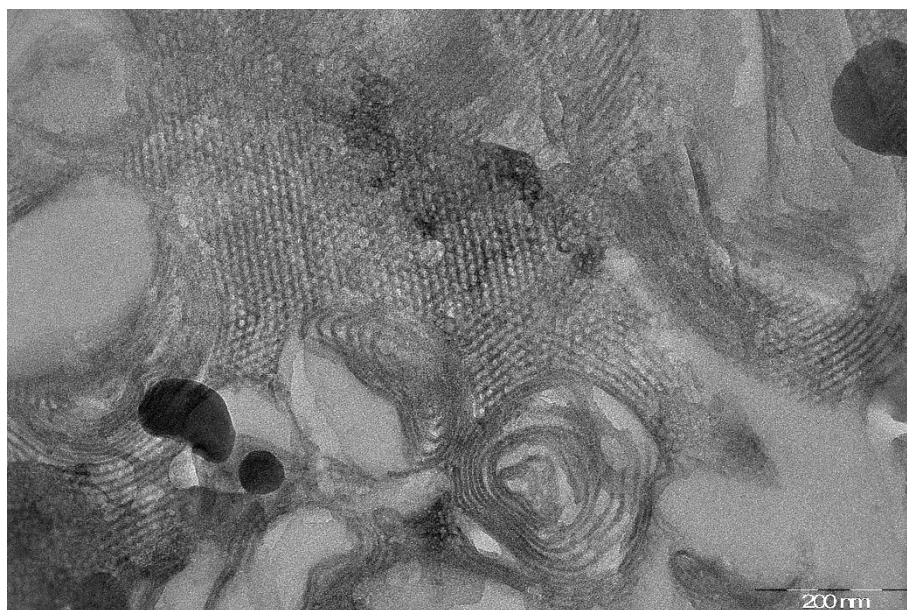

Supplement: c7nj00891k1.pdf [file c7nj00891k1.pdf]
